1 **Defining the transcriptional and post-transcriptional landscapes of**  
2 ***Mycobacterium smegmatis* in aerobic growth and oxygen limitation**

3 M. Carla Martini<sup>1</sup>, Ying Zhou<sup>1</sup>, Huaming Sun<sup>2</sup>, Scarlet S. Shell<sup>1,2\*</sup>

4

5 **1.** Department of Biology and Biotechnology, Worcester Polytechnic Institute, Worcester, MA,  
6 USA.

7 **2.** Program in Bioinformatics and Computational Biology, Worcester Polytechnic Institute,  
8 Worcester, MA, USA.

9

10 \*To whom correspondence should be addressed: [sshell@wpi.edu](mailto:sshell@wpi.edu)

11

12 **Keywords:** Tuberculosis, *Mycobacterium smegmatis*, transcription start sites, TSS, RNA  
13 cleavage, RNA processing, hypoxia, transcriptome, leaderless transcription.

## 14 ABSTRACT

15 The ability of *Mycobacterium tuberculosis* to infect, proliferate, and survive during long periods  
16 in the human lungs largely depends on the rigorous control of gene expression. Transcriptome-  
17 wide analyses are key to understanding gene regulation on a global scale. Here, we combine 5'-  
18 end-directed libraries with RNAseq expression libraries to gain insight into the transcriptome  
19 organization and post-transcriptional mRNA cleavage landscape in mycobacteria during log phase  
20 growth and under hypoxia, a physiologically relevant stress condition. Using the model organism  
21 *Mycobacterium smegmatis*, we identified 6,090 transcription start sites (TSSs) with high  
22 confidence during log phase growth, of which 67% were categorized as primary TSSs for  
23 annotated genes, and the remaining were classified as internal, antisense or orphan, according to  
24 their genomic context. Interestingly, over 25% of the RNA transcripts lack a leader sequence, and  
25 of the coding sequences that do have leaders, 53% lack a strong consensus Shine-Dalgarno site.  
26 This indicates that like *M. tuberculosis*, *M. smegmatis* can initiate translation through multiple  
27 mechanisms. Our approach also allowed us to identify over 3,000 RNA cleavage sites, which occur  
28 at a novel sequence motif. The cleavage sites show a positional bias toward mRNA regulatory  
29 regions, highlighting the importance of post-transcriptional regulation in gene expression. We  
30 show that in low oxygen, a condition associated with the host environment during infection,  
31 mycobacteria change their transcriptomic profiles and endonucleolytic RNA cleavage is markedly  
32 reduced, suggesting a mechanistic explanation for previous reports of increased mRNA half-lives  
33 in response to stress. In addition, a number of TSSs were triggered in hypoxia, 56 of which contain  
34 the binding motif for the sigma factor SigF in their promoter regions. This suggests that SigF  
35 makes direct contributions to transcriptomic remodeling in hypoxia-challenged mycobacteria. Our  
36 results show that *M. smegmatis* and *M. tuberculosis* share a large number of similarities at the  
37 transcriptomic level, suggesting that similar regulatory mechanisms govern both species.

38

## 39 INTRODUCTION

40 Tuberculosis is a disease of global concern caused by *Mycobacterium tuberculosis* (Mtb).  
41 This pathogen has the ability to infect the human lungs and survive there for long periods, often  
42 by entering into non-growing states. During infection, Mtb must overcome a variety of stressful  
43 conditions, including nutrient starvation, low pH, oxygen deprivation and the presence of reactive  
44 oxygen species. Consequently, the association of Mtb with its host and the adaptation to the  
45 surrounding environment requires rigorous control of gene expression.

46 As the slow growth rate and pathogenicity of Mtb present logistical challenges in the  
47 laboratory, many aspects of its biology have been studied in other mycobacterial species. One of  
48 the most widely used models is mycobacteria is *Mycobacterium smegmatis*, a non-pathogenic fast-  
49 growing bacterium that shares substantial genomic similarity with Mtb. A PubMed search for  
50 "*Mycobacterium smegmatis*" returns 3,907 publications, reflecting the sizable body of published  
51 work involving this model organism. While there are marked differences between the genomes,  
52 such as the highly represented PE/PPE-like gene category and other virulence factors present in  
53 Mtb and poorly represented or absent in *M. smegmatis*, these organisms have at least 2,117  
54 orthologous genes (Prasanna & Mehra, 2013) making *M. smegmatis* a viable model to address  
55 questions about the fundamental biology of mycobacteria. Indeed, studies using *M. smegmatis*

56 have revealed key insights into relevant aspects of *Mtb* biology including the Sec and ESX  
57 secretion systems involved in transport of virulence factors (Coros *et al.*, 2008, Rigel *et al.*, 2009),  
58 bacterial survival during anaerobic dormancy (Dick *et al.*, 1998, Bagchi *et al.*, 2002, Trauner *et*  
59 *al.*, 2012, Pecsí *et al.*, 2014) and the changes induced during nutrient starvation (Elharar *et al.*,  
60 2014, Wu *et al.*, 2016, Hayashi *et al.*, 2018). However, the similarities and differences between *M.*  
61 *smegmatis* and *M. tuberculosis* at the level of transcriptomic organization have not been  
62 comprehensively reported.

63 Identification of transcription start sites (TSSs) is an essential step towards understanding  
64 how bacteria organize their transcriptomes and respond to changing environments. Genome-wide  
65 TSS mapping studies have been used to elucidate the general transcriptomic features in many  
66 bacterial species, leading to the identification of promoters, characterization of 5' untranslated  
67 regions (5' UTRs), identification of RNA regulatory elements and transcriptional changes in  
68 different environmental conditions (examples include (Albrecht *et al.*, 2009, Mitschke *et al.*, 2011,  
69 Cortes *et al.*, 2013, Schlüter *et al.*, 2013, Dinan *et al.*, 2014, Ramachandran *et al.*, 2014, Sass *et*  
70 *al.*, 2015, Shell *et al.*, 2015, Thomason *et al.*, 2015, Berger *et al.*, 2016, Čuklina *et al.*, 2016,  
71 D'arrigo *et al.*, 2016, Heidrich *et al.*, 2017, Li *et al.*, 2017). To date, two main studies have reported  
72 the transcriptomic landscape in *Mtb* during exponential growth and carbon starvation (Cortes *et*  
73 *al.*, 2013, Shell *et al.*, 2015). These complementary studies revealed that, unlike most bacteria, a  
74 substantial percentage (~25%) of the transcripts are leaderless, lacking a 5' UTR and consequently  
75 a Shine-Dalgarno ribosome-binding site. In addition, a number of previously unannotated ORFs  
76 encoding putative small proteins were found (Shell *et al.*, 2015), showing that the transcriptional  
77 landscape can be more complex than predicted by automated genome annotation pipelines. Thus,  
78 TSS mapping is a powerful tool to gain insight into transcriptomic organization and identify novel  
79 genes. Less is known about the characteristics of the *M. smegmatis* transcriptome. A recent study  
80 reported a number of *M. smegmatis* TSSs in normal growth conditions (Li *et al.* 2017). However,  
81 this work was limited to identification of primary gene-associated TSSs and lacked of an analysis  
82 of internal and antisense TSSs, as well as characterization of promoter regions and other relevant  
83 transcriptomic features. In addition, Potgieter and collaborators (Potgieter *et al.*, 2016) validated a  
84 large number of annotated ORFs using proteomics and were able to identify 63 previously  
85 unannotated leaderless ORFs.

86 To achieve a deeper characterization of the *M. smegmatis* transcriptional landscape, we  
87 combined 5'-end-mapping and RNAseq expression profiling under two different growth  
88 conditions. Here we present an exhaustive analysis of *M. smegmatis* transcriptome during  
89 exponential growth and hypoxia. Unlike most transcriptome-wide TSS analyses, our approach  
90 allowed us to study not only the transcriptome organization in different conditions, but also the  
91 frequency and distribution of RNA cleavage sites on a genome wide scale. Whereas regulation at  
92 the transcriptional level is assumed to be the main mechanism that modulates gene expression in  
93 bacteria, post-transcriptional regulation is a key step in the control of gene expression and has been  
94 implicated in the response to host conditions and virulence in various bacterial pathogens  
95 (Kulesekara *et al.*, 2006, Mraheil *et al.*, 2011, Heroven *et al.*, 2012, Jurénaitė *et al.*, 2013, Schifano  
96 *et al.*, 2013, Holmqvist *et al.*, 2016). Some regulatory mechanisms including small non-coding  
97 RNAs, RNases, Toxin-Antitoxin (TA) systems, RNA-binding proteins, and riboswitches have  
98 been described in mycobacteria ((Fields & Switzer, 2007, Warner *et al.*, 2007, Sala *et al.*, 2008,  
99 DiChiara *et al.*, 2010, McKenzie *et al.*, 2012, Winther *et al.*, 2016) and others), emphasizing the  
100 importance of post-transcriptional regulation. Here we show that RNA cleavage decreases during

101 adaptation to hypoxia, suggesting that RNA cleavage may be a refinement mechanism contributing  
102 to the regulation of gene expression in harsh conditions.

103

## 104 **MATERIALS AND METHODS**

### 105 **Strains and growth conditions used in this study.**

106 *M. smegmatis* strain mc<sup>2</sup>155 was grown in Middlebrook 7H9 supplemented with ADC  
107 (Albumin Dextrose Catalase, final concentrations 5 g/L bovine serum albumin fraction V, 2 g/L  
108 dextrose, 0.85 g/L sodium chloride, and 3 mg/L catalase), 0.2% glycerol and 0.05% Tween 80.  
109 For the exponential phase experiment (Dataset 1), 50 ml conical tubes containing 5 ml of 7H9  
110 were inoculated with *M. smegmatis* to have an initial OD=0.01. Cultures were grown at 37°C and  
111 250 rpm. Once cultures reached an OD of 0.7 – 0.8, they were frozen in liquid nitrogen and stored  
112 at -80°C until RNA purification. For hypoxia experiments (Dataset 2), the Wayne model (Wayne  
113 & Hayes, 1996) was implemented. Briefly, 60 ml serum bottles (Wheaton) were inoculated with  
114 36.5 ml of *M. smegmatis* culture with an initial OD=0.01. The bottles were sealed with rubber caps  
115 (Wheaton, W224100-181 Stopper, 20mm) and aluminum caps (Wheaton, 20 mm aluminum seal)  
116 and cultures were grown at 37 °C and 125 rpm to generate hypoxic conditions. Samples were taken  
117 at an early hypoxia stage (15 hours) and at a late hypoxia stage (24 hours). These time points were  
118 experimentally determined according to growth curves experiments (see **Figure S1**). 15 ml of each  
119 culture were sampled and frozen immediately in liquid nitrogen until RNA extraction.

### 120 **RNA extraction**

121 RNA was extracted as follows: frozen cultures stored at -80°C were thawed on ice and  
122 centrifuged at 4,000 rpm for 5 min at 4 °C. The pellets were resuspended in 1 ml Trizol (Life  
123 Technologies) and placed in tubes containing Lysing Matrix B (MP Bio). Cells were lysed by  
124 bead-beating twice for 40 sec at 9 m/sec in a FastPrep 5G instrument (MP Bio). 300 µl chloroform  
125 was added and samples were centrifuged for 15 minutes at 4,000 rpm at 4°C. The aqueous phase  
126 was collected and RNA was purified using Direct-Zol RNA miniprep kit (Zymo) according to the  
127 manufacturer's instructions. Samples were then treated with DNase Turbo (Ambion) for one hour  
128 and purified with a RNA Clean & Concentrator-25 kit (Zymo) according to the manufacturer's  
129 instructions. RNA integrity was checked on 1% agarose gels and concentrations were determined  
130 using a Nanodrop instrument. Prior to library construction, 5 µg RNA was used for rRNA depletion  
131 using Ribo-Zero rRNA Removal Kit (Illumina) according to the manufacturer's instructions.

### 132 **Construction of 5'-end-mapping libraries**

133 After rRNA depletion, RNA samples from each biological replicate were split in three, in  
134 order to generate two 5'-end differentially treated libraries and one RNAseq expression library  
135 (next section). RNA for library 1 ("converted" library) was treated either with RNA 5'  
136 pyrophosphohydrolase RPPH (NEB) (exponential phase experiment, Dataset 1), or with 5'  
137 polyphosphatase (Epicentre) (hypoxia experiment, Dataset 2), in order to remove the native 5'  
138 triphosphates of primary transcripts, whereas RNA for Library 2 ("non-converted" library) was  
139 subject to mock treatment. Thus, the converted libraries capture both 5' triphosphates (converted  
140 to monophosphates) and native 5' monophosphate transcripts, while non-converted libraries

141 capture only native 5' monophosphates (see scheme in **Figure S2.A**). Library construction was  
142 performed as described by Shell et al (Shell *et al.*, 2015). A detailed scheme showing the workflow  
143 of 5'-end libraries construction, the primers and adapters used in each step, and modifications to  
144 the protocol are shown in **Figure S2.B**.

### 145 **Construction of RNAseq expression libraries**

146 One third of each rRNA-depleted RNA sample was used to construct RNAseq expression  
147 libraries. KAPA stranded RNA-Seq library preparation kit and NEBNext Ultra RNA library prep  
148 kit for Illumina (NEB) were used for Dataset 1 and Dataset 2, respectively, according to  
149 manufacturer's instructions. The following major modifications were introduced into the  
150 protocols: *i*) For RNA fragmentation, in order to obtain fragments around 300 nt, RNA was mixed  
151 with the corresponding buffer and placed at 85°C for 6 minutes (Dataset 1), or at 94°C for 12  
152 minutes (Dataset 2). *ii*) For library amplification, 10 or 19-23 PCR cycles were used for Dataset 1  
153 and Dataset 2, respectively. The number of cycles was chosen according to the amount of cDNA  
154 obtained for each sample. After purification, DNA concentration was measured in a Qubit  
155 instrument before sequencing.

### 156 **Libraries sequencing and quality assessment**

157 For 5'-end-mapping libraries from Dataset 1, Illumina MiSeq paired-end sequencing  
158 producing 100 nt reads was used. For 5' end directed libraries from Dataset 2 as well as for all  
159 expression libraries, Illumina HiSeq 2000 paired-end sequencing producing 50 nt reads was used.  
160 Sequencing was performed at the UMass Medical School Deep Sequencing Core Facility. Quality  
161 of the generated fastq files was checked using FastQC.

### 162 **Identification of 5' ends and discrimination between transcription start sites (TSSs) and** 163 **cleavage sites (CSs)**

164 Paired-end reads generated from 5'-end-directed libraries were mapped to *M. smegmatis*  
165 mc<sup>2</sup>155 NC\_008596 reference genome. In order to reduce noise from the imprecision of  
166 transcriptional initiation, only the coordinate with the highest coverage in each 5 nt window was  
167 used for downstream analyses. For read filtering, different criteria were used for the 2 datasets  
168 according to the library depth and quality (see **Figure S3**). In order to discriminate between TSSs  
169 and CSs, the ratio of the coverage in converted/non-converted libraries for each detected 5' end  
170 was calculated. To focus our analyses on the 5'ends that are relatively abundant in their local  
171 genomic context, we employed a filter based on the ratio of 5' end coverage to expression library  
172 coverage in the preceding 100nt. 5' ends for which this ratio was  $\leq 0.05$  were removed. After this  
173 filter, 15,720 5' ends remained and were further analyzed using a Gaussian mixture modelling to  
174 differentiate TSSs from CSs with a high confidence in Dataset 1 (**Figure 1A**). For this analysis,  
175 we used the iterative expectation maximization (EM) algorithm in the mixtools package (Benaglia  
176 *et al.*, 2009) for R (version 1.1.0) to fit the mixture distributions.

### 177 **Analysis of expression libraries**

178 Reads were aligned to NC\_008596 reference genome using Burrows-Wheeler Aligner (Li  
179 & Durbin, 2009). For comparison of gene expression levels according to presence or absence of



180 Shine-Dalgarno sequences, RPKMs were calculated for all genes. The DEseq2 pipeline was used  
181 to evaluate the changes in gene expression in hypoxia (Love *et al.*, 2014).

## 182 **Transcription start sites categorization**

183 For analysis in **Figure 1D**, TSSs were classified as follows: those coordinates located  $\leq$   
184 500 bp upstream from an annotated gene were considered to be primary TSSs (pTSS). Coordinates  
185 located within an annotated gene were classified as internal (iTSS) or N-associated internal TSSs  
186 (N-iTSSs) if they were located within the first 25% of the annotated coding sequence. N-iTSSs  
187 were considered for reannotation as a pTSSs only if their associated gene lacked a pTSS. TSSs  
188 located on the antisense strand of a coding sequence, 5' UTR, or 3' UTR were considered as  
189 antisense (aTSS). 5' UTRs boundaries were assigned after assignment of pTSSs to genes annotated  
190 in the reference genome NC\_008596. When a gene had more than one pTSS, the longest of the  
191 possible 5' UTRs was used for assignment of aTSSs. In the case of genes for which we did not  
192 identify a pTSS, we considered a hypothetical leader sequence of 50 bp for assignment of aTSSs.  
193 For assignment of aTSSs in 3' UTRs, we arbitrarily considered a sequence of 50 bp downstream  
194 the stop codon of the gene to be the 3' UTR. Finally, TSSs not belonging to any of the above-  
195 mentioned categories were classified as orphan (oTSSs).

## 196 **Operon prediction**

197 Adjacent genes with the same orientation were considered to be co-transcribed if there  
198 were at least 5 spanning reads between the upstream and the downstream gene in at least one of  
199 the replicates in the expression libraries from Dataset 1. After this filtering, a downstream gene  
200 was excluded from the operon if: 1) it had a TSS  $\leq$  500 bp upstream the annotated start codon on  
201 the same strand, and/or 2) had a TSS within the first 25% of the gene on the same strand, and/or  
202 3) the upstream gene had a TSS within the last 50-100% of the coding sequence. Finally, the  
203 operon was assigned only if the first gene had a primary TSS with a confidence  $\geq$  95% according  
204 to the Gaussian mixture modeling.

## 205 **Cleavage sites categorization**

206 For CS categorization in **Figure 4D**, we established stringent criteria in order to determine  
207 the frequency of CSs in each location category relative to the amount of the genome comprising  
208 that location category. For 3' UTR regions, we considered only CSs that were located between 2  
209 convergent genes. To assess frequency relative to the whole genome, we considered the sum of all  
210 regions located between two convergent genes. For 5' UTRs we considered all CSs located  
211 between 2 divergent genes, and the sum of all leader lengths for genes having a pTSS whose  
212 upstream gene is in the opposite strand (divergent) determined in this study was used for assessing  
213 relative frequency. For 5' ends corresponding to cleavages between co-transcribed genes we used  
214 the operon structures determined in this study, and the sum of all their intergenic regions was used  
215 for assessing relative frequency. Finally, for CSs located within coding sequences all genes were  
216 considered, as all of them produced reads in the expression libraries. The sum of all coding  
217 sequences in NC\_008596 genome was used for assessing relative frequency, after subtracting  
218 overlapping regions to avoid redundancy.

## 219 RESULTS

### 220 1. Mapping, annotation and categorization of transcription start sites

221 In order to study the transcriptome structure of *M. smegmatis*, RNAs from triplicate  
222 cultures in exponential phase were used to construct 5' end mapping libraries (Dataset 1, D1)  
223 according to our previously published methodologies (Shell *et al.*, 2015, Shell *et al.*, 2015) with  
224 minor modifications. Briefly, our approach relies on comparison of adapter ligation frequency in  
225 a dephosphorylated (converted) library and an untreated (non-converted) library for each sample.  
226 The converted libraries capture both 5' triphosphate and native 5' monophosphate-bearing  
227 transcripts, while the non-converted libraries capture only native 5' monophosphate-bearing  
228 transcripts (**Figure S2**). Thus, assessing the ratios of read counts in the converted/non-converted  
229 libraries permits discrimination between 5' triphosphate ends (primary transcripts from  
230 transcription start sites) and 5' monophosphate ends (cleavage sites). By employing a Gaussian  
231 mixture modeling analysis (**Figure 1A**) we were able to identify 5,552 TSSs in *M. smegmatis* with  
232 an observed probability of being a TSS  $\geq 0.95$  (high confidence TSSs, **Table S1**). A second filtering  
233 method allowed us to obtain 222 additional TSSs from Dataset 1 (**Figure S3**). A total of 5,774  
234 TSSs were therefore obtained from Dataset 1. In addition, data from separate libraries constructed  
235 as controls for the hypoxia experiment (Dataset 2, D2) in Section 8 were also included in this  
236 analysis to obtain TSSs. After noise filtering (**Figure S3**), 4,736 TSSs from D2 were identified.  
237 The union of the two datasets yielded a total of 6,090 non-redundant high confidence TSSs, of  
238 which 4,420 were detected in both datasets (**Figure S4, Table S1**).

239 Although not all 5' ends could be classified with the Gaussian mixture modeling, we were  
240 able to assign 57% of the 5' ends in Dataset 1 to one of the two 5' end populations with high  
241 confidence (5,552 TSSs and 3,344 CSs). To validate the reliability of the Gaussian mixture  
242 modeling used to classify 5' ends, we performed two additional analyses. First, according to  
243 previous findings in *Mtb* (Cortes *et al.*, 2013) and other well studied bacteria (Sass *et al.*, 2015,  
244 Berger *et al.*, 2016, Čuklina *et al.*, 2016, D'arrigo *et al.*, 2016), we anticipated that TSSs should be  
245 enriched for the presence of the ANNNT -10 promoter consensus motif in the region upstream.  
246 Evaluation of the presence of appropriately-spaced ANNNT sequences revealed that 5' ends with  
247 higher probabilities of being TSSs are enriched for this motif, whereas for those 5' ends with low  
248 probabilities of being TSSs (and thus high probabilities of being CSs) have ANNNT frequencies  
249 similar to that of the *M. smegmatis* genome as a whole (**Figure 1B**). Secondly, we predicted that  
250 TSSs should show enrichment for A and G nts at the +1 position, given the reported preference  
251 for bacterial RNA polymerases to initiate transcription with these nts (Lewis & Adhya, 2004,  
252 Mendoza-Vargas *et al.*, 2009, Mitschke *et al.*, 2011, Cortes *et al.*, 2013, Shell *et al.*, 2015,  
253 Thomason *et al.*, 2015, Berger *et al.*, 2016). Thus, we analyzed the base enrichment in the +1  
254 position for the 5' ends according the *p*-value in the Gaussian mixture modeling (**Figure 1C**).  
255 These results show a clear increase in the percentage of G and A bases in the position +1 as the  
256 probability of being a TSS increases, while the percentage of sequences having a C at +1 increases  
257 as the probability of being a TSS decreases. These two analyses show marked differences in the  
258 sequence contexts of TSSs and CSs and further validate the method used for categorization of 5'  
259 ends.

260 To study the genome architecture of *M. smegmatis*, the 6,090 TSSs were categorized  
261 according to their genomic context (**Figure 1D and 1E, Table S1**). TSSs located  $\leq 500$  nt upstream

262 of an annotated gene start codon in the *M. smegmatis* NC\_008596 reference genome were  
263 classified as primary TSSs (pTSS). TSSs within annotated genes on the sense strand were denoted  
264 as internal (iTSS). When an iTSS was located in the first quarter of an annotated gene, it was sub-  
265 classified as N-terminal associated TSS (N-iTSS), and was further examined to determine if it  
266 should be considered a primary TSS (see below). TSSs located on the antisense strand either within  
267 a gene or within a 5' UTR or 3' UTR were grouped as antisense TSSs (aTSSs). Finally, TSSs  
268 located in non-coding regions that did not meet the criteria for any of the above categories were  
269 classified as orphan (oTSSs). When a pTSS also met the criteria for classification in another  
270 category, it was considered to be pTSS for the purposes of downstream analyses. A total of 4,054  
271 distinct TSSs met the criteria to be classified as pTSSs for genes transcribed in exponential phase.  
272 These pTSSs were assigned to 3,043 downstream genes, representing 44% of the total annotated  
273 genes (**Table S2**). This number is lower than the total number of genes expressed in exponential  
274 phase, in large part due to the existence of polycistronic transcripts (see operon prediction below).  
275 Interestingly, 706 (23%) of these genes have at least two pTSSs and 209 (7%) have three or more,  
276 indicating that transcription initiation from multiple promoters is common in *M. smegmatis*.

277 A total of 995 iTSSs (excluding the iTSSs that were also classified as a pTSS of a  
278 downstream gene, see **Figure S5** for classification workflow) were identified in 804 (12%) of the  
279 annotated genes, indicating that transcription initiation within coding sequences is common in *M.*  
280 *smegmatis*. iTSSs are often considered to be pTSSs of downstream genes, to be spurious events  
281 yielding truncated transcripts, or to be consequences of incorrect gene start annotations. However,  
282 there is evidence supporting the hypothesis that iTSSs are functional and highly conserved among  
283 closely related bacteria (Shao *et al.*, 2014), highlighting their potential importance in gene  
284 expression.

285 We were also able to detect antisense transcription in 12.5 % of the *M. smegmatis* genes.  
286 Antisense transcription plays a role in modulation of gene expression by controlling transcription,  
287 RNA stability, and translation (Morita *et al.*, 2005, Kawano *et al.*, 2007, Andre *et al.*, 2008, Fozo  
288 *et al.*, 2008, Giangrossi *et al.*, 2010) and has been found to occur at different rates across bacterial  
289 genera, ranging from 1.3% of genes in *Staphylococcus aureus* to up to 46% of genes in  
290 *Helicobacter pylori* (Beaume *et al.*, 2010, Sharma *et al.*, 2010). Of the 1,006 aTSSs identified here  
291 (excluding those that were primarily classified as pTSSs), 881 are within coding sequences, 120  
292 are within 5' UTRs and 72 are located within 3' UTRs (note that some aTSS are simultaneously  
293 classified in more than one of these three subcategories, **Figure S6**). While we expect that many  
294 of the detected antisense transcripts have biological functions, it is difficult to differentiate  
295 antisense RNAs with regulatory functions from transcriptional noise. In this regard, Lloréns-Rico  
296 and collaborators (Llorens-Rico & Cano, 2016) reported that most of the antisense transcripts  
297 detected using transcriptomic approaches are a consequence of transcriptional noise, arising at  
298 spurious promoters throughout the genome. To investigate the potential significance of the *M.*  
299 *smegmatis* aTSSs, we assessed the relative impact of each aTSS on local antisense expression  
300 levels by comparing the read depth upstream and downstream of each aTSS in our RNAseq  
301 expression libraries. We found 318 aTSSs for which expression coverage was  $\geq 10$ -fold higher in  
302 the 100 nt window downstream of the TSS compared to the 100 nt window upstream (**Table S3**).  
303 Based on the magnitude of the expression occurring at these aTSS, we postulate that they could  
304 represent the 5' ends of candidate functional antisense transcripts rather than simply products of  
305 spurious transcription. However, further work is needed to test this hypothesis. Finally, 78 oTSSs



306 were detected across the *M. smegmatis* genome. These TSSs may be the 5' ends of non-coding  
307 RNAs or mRNAs encoding previously unannotated ORFs.

308 Out of the 995 iTSSs identified, 457 were located within the first quarter of an annotated  
309 gene (N-iTSSs). In cases where there was no pTSS, we considered the possibility that the start  
310 codon of the gene was misannotated and the N-iTSS was in fact the primary TSS. Although we do  
311 not discount the possibility that functional proteins can be produced when internal transcription  
312 initiation occurs far downstream of the annotated start codon, we only considered N-iTSSs  
313 candidates for gene start reannotation when there was a start codon (ATG, GTG or TTG) in-frame  
314 with the annotated gene in the first 30% of the annotated sequence. In this way, we suggest re-  
315 annotations of the start codons of 213 coding sequences (see **Table S4**). These N-iTSSs were  
316 considered to be pTSSs (N-iTSSs → pTSSs) for all further analyses described in this work.

## 317 **2. Operon prediction**

318 To predict operon structure, we combined 5' end libraries and RNAseq expression data.  
319 We considered two or more genes to be co-transcribed if (1) they had spanning reads that  
320 overlapped both the upstream and downstream gene in the expression libraries, (2) at least one  
321 TSS was detected in the 5' end-directed libraries for the first gene of the operon, and (3) the  
322 downstream gene(s) lacked pTSSs and iTSSs (for more detail, see Materials and Methods). Thus,  
323 we were able to identify and annotate 294 operons with high confidence across the *M. smegmatis*  
324 genome (**Table S5**). These operons are between 2 and 4 genes in length and comprise a total of  
325 638 genes. Our operon prediction methodology has some limitations. For example, operons not  
326 expressed in exponential growth phase could not be detected in our study. Furthermore, internal  
327 promoters within operons can exist, leading to either monocistronic transcripts or suboperons  
328 (Guell *et al.*, 2009, Paletta & Ohman, 2012, Skliarova *et al.*, 2012). We limited our operon  
329 predictions to genes that appear to be exclusively co-transcribed, excluding those cases in which  
330 an internal gene in an operon can be alternatively transcribed from an assigned pTSS. Finally, our  
331 analysis did not capture operons in which the first gene lacked a high-confidence pTSS. Despite  
332 these limitations, our approach allowed us to successfully identify new operons as well as  
333 previously described operons. Previously reported operons that were captured by our predictions  
334 included the *furA-katG* (MSMEG\_6383-MSMEG\_6384) operon involved in oxidative stress  
335 response (Milano *et al.*, 2001), the *vapB-vapC* (MSMEG\_1283-MSMEG\_1284) Toxin–Antitoxin  
336 module (Robson *et al.*, 2009) operon, and the *ClpP1-ClpP2* (MSMEG\_4672-MSMEG\_4673)  
337 operon involved in protein degradation (Raju *et al.*, 2012).

## 338 **3. Characterization of *M. smegmatis* promoters reveals features conserved in *M. tuberculosis***

339 Most bacterial promoters have two highly conserved regions, the -10 and the -35, that  
340 interact with RNA polymerase via sigma factors. However, it was reported that the -10 region is  
341 necessary and sufficient for transcription initiation by the housekeeping sigma factor SigA in  
342 mycobacteria, and no SigA -35 consensus motifs were identified in previous studies (Cortes *et al.*,  
343 2013, Newton-Foot & Gey van Pittius, 2013, Zhu *et al.*, 2017). to characterize the core promoter  
344 motifs in *M. smegmatis* on a global scale we analyzed the 50 bp upstream of the TSSs. We found  
345 that 4,833 of 6,090 promoters analyzed (79%) have an ANNNT motif located between positions -  
346 6 to -13 upstream the TSSs (**Figure 2A**). In addition, 63% of the promoters with ANNNT motifs  
347 have a thymidine preceding this sequence (TANNNT). This motif is similar to that previously

348 described in a transcriptome-wide analysis for *Mtb* (Cortes *et al.*, 2013) and for most bacterial  
349 promoters that are recognized by the  $\sigma^{70}$  housekeeping sigma factor (Ramachandran *et al.*, 2014,  
350 Sass *et al.*, 2015, Berger *et al.*, 2016, Čuklina *et al.*, 2016, D'arrigo *et al.*, 2016). However, no  
351 apparent bias towards specific bases in the NNN region was detected in our study or in *Mtb*, while  
352 in other bacteria such as *E. coli*, *S. enterica*, *B. cenocepacia*, *P. putida*, and *B. subtilis* an A/T  
353 preference was observed in this region (Jarmer *et al.*, 2001, Ramachandran *et al.*, 2014, Sass *et al.*,  
354 2015, Berger *et al.*, 2016, D'arrigo *et al.*, 2016). We were unable to detect a consensus motif in the  
355 -35 region either using MEME server (Bailey *et al.*, 2015) or manually assessing the possible base-  
356 enrichment in the -35 region. Analysis of the sequences in the immediate vicinity of TSSs revealed  
357 that G and A are the most frequent bases at the +1 position, and C is considerably more abundant  
358 at -1 (**Figure 2B**).

359 Interestingly, we identified several alternative motifs in the -10 promoter regions of  
360 transcripts lacking the ANNNT motif (**Figure 2A**). One of these, (G/C)NN(G/C)NN(G/C), is  
361 likely the signature of *M. smegmatis*' codon bias in the regions upstream of iTSSs. The other three  
362 sequences are candidate binding sites for alternative sigma factors, which are known to be  
363 important in regulation of transcription under diverse environmental conditions. However, the  
364 identified consensus sequences differ substantially from those previously described in  
365 mycobacteria (Raman *et al.*, 2001, Raman *et al.*, 2004, Sun *et al.*, 2004, Lee *et al.*, 2008, Lee *et al.*,  
366 2008, Song *et al.*, 2008, Veyrier *et al.*, 2008, Humpel *et al.*, 2010, Gaudion *et al.*, 2013). The  
367 TSSs having these sigma factor motifs and the associated genes are listed in **Table S6**. We next  
368 examined the relationship between promoter sequence and promoter strength, as estimated by the  
369 read depths in the 5' end converted libraries. As shown in **Figure 2C**, the expression levels of  
370 transcripts with ANNNT -10 motifs are on average substantially higher than those lacking this  
371 sequence. In addition, promoters with the full TANNNT motif are associated with more highly  
372 abundant transcripts compared to those having a VANNNT sequence, where V is G, A or C. These  
373 results implicate TANNNT as the preferred -10 sequence for the housekeeping sigma factor, SigA,  
374 in *M. smegmatis*. As shown in **Figure 2C**, expression levels of transcripts having the motif 2 in  
375 **Figure 2A** were significantly increased when compared to those lacking the ANNNT motif.

#### 376 **4. Leaderless transcription is a prominent feature of the *M. smegmatis* transcriptome**

377 5' UTRs play important roles in post-transcriptional regulation and translation, as they may  
378 contain regulatory sequences that can affect mRNA stability and/or translation efficiency.  
379 Whereas in most bacteria 5'-UTR bearing ("leadered") transcripts predominate, this is not the case  
380 for *Mtb*, in which near one quarter of the transcripts have been reported to be leaderless (Cortes *et al.*  
381 *et al.*, 2013, Shell *et al.*, 2015). To investigate this feature in *M. smegmatis*, we analyzed the 5' UTR  
382 lengths of all genes that had at least one pTSS. We found that for 24% of the transcripts the TSS  
383 coincides with the translation start site or produces a leader length  $\leq 5$  nt, resulting in leaderless  
384 transcripts (**Figure 3A**). A total of 1,099 genes (including those re-annotated in section 1) have  
385 leaderless transcripts, and 155 of those (14%) are also transcribed as leadered mRNAs from  
386 separate promoters. For leadered transcripts, the median 5' UTR length was 69 nt. Interestingly,  
387 15% of the leaders are  $> 200$  nt, suggesting that these sequences may contain potential regulatory  
388 elements. We then sought to compare the leader lengths of *M. smegmatis* genes with the leader  
389 lengths of their homologs in *Mtb*. For this analysis we used two independent pTSS mapping *Mtb*  
390 datasets obtained from Cortes *et al.*, 2013 and Shell *et al.*, 2015 (**Figure 3B**). To avoid ambiguities,  
391 we used only genes that had a single pTSS in both species. Our results show a statistically

392 significant correlation of leader lengths between species, suggesting that similar genes conserve  
393 their transcript features and consequently may have similar regulatory mechanisms. Additionally,  
394 comparison of leaderless transcription in *M. smegmatis* and Mtb revealed that 62% or 73% of the  
395 genes that are only transcribed as leaderless in *M. smegmatis* also lack a 5' UTR in MTB, according  
396 to Cortes et al, 2013 or Shell et al, 2015, respectively (**Table S7**). We next assessed if leaderless  
397 transcripts are associated with particular gene categories, and found the distribution across  
398 categories was uneven (**Figure 3C**). The three categories “DNA metabolism,” “Amino acid  
399 biosynthesis,” and “Biosynthesis of cofactors, prosthetic groups and carriers” were significantly  
400 enriched in leaderless transcripts ( $p$ -value < 0.05, hypergeometric test), while “Signal  
401 transduction,” “Transcription,” and “Transport and binding proteins” appear to have less leaderless  
402 transcripts.

403 We next evaluated the presence of the Shine-Dalgarno ribosome-binding site (SD)  
404 upstream of leadered coding sequences. For this analysis, we considered those leaders containing  
405 at least one of the three tetramers AGGA, GGAG or GAGG (core sequence AGGAGG) in the  
406 region -6 to -17 relative to the start codon to possess canonical SD motifs. We found that only 47%  
407 of leadered coding sequences had these canonical SD sequences. Thus, considering also the  
408 leaderless RNAs, a large number of transcripts lack canonical SD sequences, suggesting that  
409 translation initiation can occur through multiple mechanisms in *M. smegmatis*. We further  
410 compared the relative expression levels of leaderless and leadered coding sequences subdivided  
411 by SD status. Genes expressed as both leadered and leaderless transcripts were excluded from this  
412 analysis. We found that on average, expression levels were significantly higher for those genes  
413 with canonical SD sequences than for those with leaders but lacking this motif and for those that  
414 were leaderless (**Figure 3D**). Together, these data suggest that genes that are more efficiently  
415 translated have also higher transcript levels. Similar findings were made in Mtb, where proteomic  
416 analyses showed increased protein levels for genes with SD sequences compared to those lacking  
417 this motif (Cortes *et al.*, 2013).

## 418 **5. Identification of novel leaderless ORFs in the *M. smegmatis* genome**

419 As GTG or ATG codons are sufficient to initiate leaderless translation in mycobacteria  
420 (Shell *et al.*, 2015, Potgieter *et al.*, 2016), we used this feature to look for unannotated ORFs in the  
421 *M. smegmatis* NC\_008596 reference genome. Using 1,579 TSSs that remained after pTSS  
422 assignment and gene reannotation using N-iTSSs (see **Figure S5**) we identified a total of 66  
423 leaderless ORFs encoding putative proteins longer than 30 amino acids, 5 of which were  
424 previously identified (Shell *et al.*, 2015). 83% of these ORFs were predicted in other annotations  
425 of the *M. smegmatis* mc<sup>2</sup>155 or MKD8 genome (NC\_018289.1, (Gray *et al.*, 2013)), while 10 of  
426 the remaining ORFs showed homology to genes annotated in other mycobacterial species and  
427 *Helobdella robusta* and two ORFs did not show homology to any known protein. These results  
428 show that automatic annotation of genomes can be incomplete and highlight the utility of  
429 transcriptomic analysis for genome (re)annotation. Detailed information on these novel putative  
430 ORFs is provided in **Table S8**.

## 431 **6. Endonucleolytic RNA cleavage occurs at a distinct sequence motif and is common in** 432 **mRNA regulatory regions**

433 As our methodology allows us to precisely map RNA cleavage sites in addition to TSSs,  
434 we sought to analyze the presence and distribution of cleavage sites in the *M. smegmatis*  
435 transcriptome. mRNA processing plays a crucial role in regulation of gene expression, as it is  
436 involved in mRNA maturation, stability and degradation (Arraiano *et al.*, 2010). Mixture modeling  
437 identified 3,344 CSs with a posterior probability  $\geq 0.9$  (high confidence CSs) (**Figure 1A, Table**  
438 **S9**). To determine the sequence context of the CSs, we used the regions flanking the 5' ends to  
439 generate a sequence logo (**Figure 4A**). There was a strong preference for a cytosine in the +1  
440 position (present in more than the 90% of the CSs) (**Figure 4B**), suggesting that it may be  
441 structurally important for RNase recognition and/or catalysis.

442 Cleaved 5' ends can represent either degradation intermediates or transcripts that undergo  
443 functional processing/maturation. In an attempt to investigate CS function, we classified them  
444 according to their locations within mRNA transcripts (**Figure 4C, Table S9**). We found that, after  
445 normalizing to the proportion of the expressed transcriptome that is comprised by each location  
446 category, cleaved 5' ends are more abundant within 5' UTRs and intergenic regions of operons  
447 than within coding sequences and 3' UTRs (**Figure 4D**). Stringent criteria were used in these  
448 analyses to avoid undesired bias (**Figure 4C** and Materials and Methods). While one would expect  
449 the CSs associated with mRNA turnover to be evenly distributed throughout the transcript,  
450 enrichment of CSs within the 5' UTRs as well as between two co-transcribed genes may be  
451 indicative of cleavages associated with processing and maturation. Alternatively, these regions  
452 may be more susceptible to RNases due to lack of associated ribosomes. Here we predicted with  
453 high confidence that at least 101 genes have one or more CSs in their 5' UTRs (**Table S10**).

454 We detected cleaved 5' ends within the coding sequences of 18% of *M. smegmatis* genes,  
455 ranging from 1 to over 40 sites per gene. We analyzed the distribution of CSs within coding  
456 sequences (**Figure S7**), taking into consideration the genomic context of the genes. When  
457 analyzing the distribution of CSs within the coding sequences of genes whose downstream gene  
458 has the same orientation, we observed an increase in CS frequency in the region near the stop  
459 codon (**Figure S7.A**). However, when only coding sequences having a downstream gene on the  
460 opposite strand (convergent) were considered, the distribution of CSs through the coding  
461 sequences was significantly different ( $p$ -value  $< 0.0001$ , Kolmogorov-Smirnov D test) with the CSs  
462 more evenly distributed throughout the coding sequence (**Figure S7.B**). This suggests that the  
463 cleavage bias towards the end of the genes observed in **Figure S7.A** may be due to the fact that  
464 many of these CSs are actually occurring in the 5' UTRs of the downstream genes. In cases where  
465 the TSS of a given gene occurs within the coding sequence of the preceding gene, a CS may map  
466 to both the coding sequence of the upstream gene and the 5' UTR of the downstream gene. In these  
467 cases, we cannot determine in which of the two transcripts the cleavage occurred. However,  
468 cleavages may also occur in polycistronic transcripts. We therefore assessed the distributions of  
469 CSs in the operons predicted above. The distribution of CSs in genes co-transcribed with a  
470 downstream gene showed a slight increase towards the last part of the gene (**Figure S7.C**). This  
471 may reflect cases in which polycistronic transcripts are cleaved near the 3' end of an upstream  
472 gene, as has been reported for the *furA-katG* operon, in which a cleavage near the stop codon of  
473 *furA* was described (Milano *et al.*, 2001, Sala *et al.*, 2008, Taverniti *et al.*, 2011). The *furA-katG*  
474 cleavage was identified in our dataset, located 1 nt downstream of the previously reported position.  
475 A similar enrichment of CSs towards stop codons was also observed in a recent genome-wide  
476 RNA cleavage analysis in *Salmonella enterica* (Chao *et al.*, 2017), although in this case the high



477 frequency of cleavage may be also attributed to the U preference of RNase E in this organism,  
478 which is highly abundant in these regions.

## 479 **7. Prediction of additional TSSs and CSs based on sequence context**

480 The sequence contexts of TSSs (**Figure 2B**) and CSs (**Figure 4A**) were markedly different,  
481 as G and A were highly preferred in the TSS +1 position whereas C was highly preferred in the  
482 CS +1 position, and TSSs were associated with a strong overrepresentation of ANNNT -10 sites  
483 while CSs were not. These sequence-context differences not only provide validation of our  
484 methodology for distinguishing TSSs from CSs, as discussed above, but also provide a means for  
485 making improved predictions of the nature of 5' ends that could not be categorized with high  
486 confidence based on their converted/non-converted library coverage alone. Taking advantage of  
487 these differences, we sought to obtain a list of additional putative TSSs and CSs. Thus, of the 5'  
488 ends that were not classified by high confidence by mixture modeling, we selected those that had  
489 an appropriately positioned ANNNT motif upstream and a G or an A in the +1 position and  
490 classified them as TSSs with medium confidence (**Table S11**). In the same way, 5' ends with a C  
491 in the +1 position and lacking the ANNNT motif in the region upstream were designated as  
492 medium confidence CSs (**Table S12**). In this way, we were able to obtain 576 and 4,838 medium  
493 confidence TSSs and CSs, respectively. Although we are aware of the limitations of these  
494 predictions, these lists of medium confidence 5' ends provide a resource that may be useful for  
495 guiding further studies. 5' ends that did not meet the criteria for high or medium confidence TSSs  
496 or CSs are reported in **Table S13**.

## 497 **8. The transcriptional landscape changes in response to oxygen limitation**

498 We sought to study the global changes occurring at the transcriptomic level in oxygen  
499 limitation employing the Wayne model (Wayne & Hayes, 1996) with some modifications (see  
500 Materials and Methods). Two timepoints were experimentally determined in order to evaluate  
501 transcriptomic changes during the transition into hypoxia (**Figure S1**). A different enzyme was  
502 used for conversion of 5' triphosphates to 5' monophosphates in these 5'-end libraries, and it  
503 appeared to be less effective than the enzyme used for the 5' end libraries in dataset 1. As a  
504 consequence, our ability to distinguish TSSs from CSs *de novo* in these datasets was limited.  
505 However, we were able to assess changes in abundance of the 5' ends classified as high-confidence  
506 TSSs or CSs in Dataset 1, as well as identify a limited number of additional TSSs and CSs with  
507 high confidence (**Figure S4, Table S1**). Corresponding RNAseq expression libraries revealed that,  
508 as expected, a large number of genes were up and downregulated in response to oxygen limitation  
509 (**Figure S8, Table S14**). We next investigated the transcriptional changes in hypoxia by assessing  
510 the relative abundance of TSSs in these conditions. We found 318 high-confidence TSSs whose  
511 abundance varied substantially between exponential phase and hypoxia (**Table S15**). A robust  
512 correlation was observed between the pTSS peak height in the 5'-end-directed libraries and RNA  
513 levels in the expression libraries for hypoxia (**Figure S9**). In an attempt to identify promoter motifs  
514 induced in hypoxia, we analyzed the upstream regions of those TSSs whose abundance increased  
515 (fold change  $\geq 2$ , adjusted  $p$ -value  $\leq 0.05$ ). Interestingly, we detected a conserved GGGTA motif in  
516 the -10 region of 56 promoters induced in hypoxia using MEME (**Figure 5A, Table S15**). This  
517 motif was reported as the binding site for alternative sigma factor SigF (Rodrigue *et al.*, 2007,  
518 Hartkoorn *et al.*, 2010, Humpel *et al.*, 2010). Additionally, the extended -35 and -10 SigF motif  
519 was found in 44 of the 56 promoter sequences. (**Figure 5A, Table S15**). SigF was shown to be



520 induced in hypoxia at the transcript level in *Mtb* (Iona *et al.*, 2016) and highly induced at the  
521 protein level under anaerobic conditions using the Wayne model in *M. bovis* BCG strain (Michele  
522 *et al.*, 1999) (Galagan *et al.*, 2013). In *M. smegmatis*, SigF was shown to play a role under oxidative  
523 stress, heat shock, low pH and stationary phase (Gebhard *et al.*, 2008, Humpel *et al.*, 2010, Singh  
524 *et al.*, 2015) and *sigF* RNA levels were detected in exponential phase at a nearly comparable level  
525 to *sigA* (Singh & Singh, 2008). Here, we did not detect significant changes in expression of the  
526 *sigF* gene in hypoxia at the transcript level. However, this is consistent with reported data showing  
527 that *sigF* transcript levels remain unchanged under stress conditions in *M. smegmatis* (Gebhard *et*  
528 *al.*, 2008), as it was postulated that SigF is post-transcriptionally modulated via an anti-sigma  
529 factor rather than through *sigF* transcription activation (Beaucher *et al.*, 2002). We noted that, in  
530 the case of TSSs whose abundance was reduced in hypoxia, almost the totality of the promoters  
531 contains the -10 ANNNT  $\sigma^{70}$  binding motif. We then examined the presence of SigF motif in the  
532 regions upstream of 5' ends that were not classified as high confidence TSSs. We speculate that  
533 5' ends associated with this motif may be potential TSSs triggered by hypoxia. We found 96  
534 additional putative TSSs that were (1) overrepresented in hypoxia and (2) associated with  
535 appropriately-spaced SigF motifs (**Table S16**). Three of the hypoxia-induced genes with SigF  
536 motifs have homologous genes induced in hypoxia in *Mtb* (Park *et al.*, 2003, Rustad *et al.*, 2008).

537 It is well known that under anaerobic conditions mycobacteria induce the DosR regulon, a  
538 set of genes implicated in stress tolerance (Rosenkrands *et al.*, 2002, O'Toole *et al.*, 2003, Park *et*  
539 *al.*, 2003, Roberts *et al.*, 2004, Rustad *et al.*, 2008, Honaker *et al.*, 2009, Leistikow *et al.*, 2010).  
540 The DosR transcriptional regulator was highly upregulated at both hypoxic timepoints in the  
541 expression libraries (13 and 18-fold at 15 and 24 hours, respectively). Thus, we hypothesized that  
542 the DosR binding motif should be present in a number of regions upstream the TSSs that were  
543 upregulated in hypoxia. Analysis of the 200 bp upstream the TSSs using the CentriMo tool for  
544 local motif enrichment analysis (Bailey & Machanick, 2012) allowed us to detect putative DosR  
545 motifs in 13 or 53 promoters, depending on whether a stringent (GGGACTTNGNCCCT) or a  
546 weak (RRGNCYWNNGNMM) consensus sequence was used as input (Lun *et al.*, 2009, Berney  
547 *et al.*, 2014, Gomes *et al.*, 2014) (**Table 15**). At least two of the 13 genes downstream of these  
548 TSSs were previously reported to have DosR motifs by Berney and collaborators (Berney *et al.*,  
549 2014) and RegPrecise Database (Novichkov *et al.*, 2013) and two others are homologs of genes in  
550 the *Mtb* DosR regulon that were not previously described in *M. smegmatis* as regulated by DosR  
551 (**Table S15**).

552 We then used CentriMo to search for DosR motifs in the regions upstream of 5' ends that  
553 were not classified as high confidence TSSs, given that TSSs derived from hypoxia-specific  
554 promoters may have been absent from Dataset 1. We found 36 putative TSSs associated with 20  
555 different genes (**Table S17**), of which 11 have been shown to have DosR binding motifs (Berney  
556 *et al.*, 2014). Five of these are homologs of genes in the *Mtb* DosR regulon.

## 557 **9. *M. smegmatis* decreases RNA cleavage under oxygen limitation**

558 There is evidence that mRNA is broadly stabilized under hypoxia and other stress  
559 conditions (Rustad *et al.*, 2013, Ignatov *et al.*, 2015). Thus, we anticipated that RNA cleavage  
560 should be reduced under hypoxia as a strategy to stabilize transcripts. We compared the relative  
561 abundance of each high confidence CS in stress and in exponential phase (**Figure 5B**) and found  
562 that RNA cleavage is significantly reduced in both hypoxia 15h and 24h on a global scale (**Figure**

563 **5C**). In contrast, relative abundance of TSSs did not decrease in these conditions, indicating that  
564 the reduction in CSs is not an artefact of improper normalization (**Figure 5B**). When the ratios of  
565 CSs abundance in hypoxia/normal growth of individual genes were analyzed, we observed the  
566 same behavior (**Figure S10**). These results indicate that the number of cleavage events per gene  
567 decreases during adaptation to hypoxia, which could contribute to the reported increases in half-  
568 life (Rustad et al, 2012).

569

## 570 **DISCUSSION**

571 In the past years, genome-wide transcriptome studies have been widely used to elucidate  
572 the genome architecture and modulation of transcription in different bacterial species (Albrecht *et*  
573 *al.*, 2009, Mendoza-Vargas *et al.*, 2009, Mitschke *et al.*, 2011, Cortes *et al.*, 2013, Schlüter *et al.*,  
574 2013, Dinan *et al.*, 2014, Ramachandran *et al.*, 2014, Innocenti *et al.*, 2015, Sass *et al.*, 2015,  
575 Thomason *et al.*, 2015, Berger *et al.*, 2016, Čuklina *et al.*, 2016, D'arrigo *et al.*, 2016, Heidrich *et*  
576 *al.*, 2017, Li *et al.*, 2017, Zhukova *et al.*, 2017). Here we combined 5'-end-directed libraries and  
577 RNAseq expression libraries to shed light on the transcriptional and post-transcriptional landscape  
578 of *M. smegmatis* in different physiological conditions.

579 The implementation of two differentially treated 5'-end libraries followed by Gaussian  
580 mixture modeling analysis allowed us to simultaneously map and classify 5' ends resulting from  
581 nucleolytic cleavage and those resulting from primary transcription with high confidence. We were  
582 able to classify 57% of the 5' ends in Dataset 1 with high confidence. In addition, we elaborated a  
583 list of medium confidence TSSs and CSs (**Tables S11 and S12**). These lists constitute a valuable  
584 resource for the research community.

585 Analysis of TSS mapping data allowed us to identify over 4,000 primary TSSs and to study  
586 the transcript features in *M. smegmatis*. The high proportion of leaderless transcripts, the lack of a  
587 consensus SD sequence in half of the leadered transcripts, and the absence of a conserved -35  
588 consensus sequence indicate that the transcription-translation machineries are relatively robust in  
589 *M. smegmatis*. The robustness of transcription and translation are features shared with *Mtb*, where  
590 25% of the transcripts lack a leader sequence (Cortes *et al.*, 2013, Shell *et al.*, 2015). In addition,  
591 high abundances of transcripts lacking 5' UTRs have been reported in other bacteria including  
592 *Corynebacterium diphtheria*, *Leptospira interrogans*, *Borrelia burgdorferi*, and *Deinococcus*  
593 *deserti*, the latter having 60% leaderless transcripts (de Groot *et al.*, 2014, Adams *et al.*, 2017,  
594 Zhukova *et al.*, 2017, Wittchen *et al.*, 2018). Considering the high proportion of leaderless  
595 transcripts and the large number of leadered transcripts that lack a SD sequence (53%), it follows  
596 that an important number of transcripts are translated without canonical interactions between the  
597 mRNA and anti-Shine-Dalgarno sequence, suggesting that *M. smegmatis* has versatile  
598 mechanisms to address translation. A computational prediction showed that the presence of SD  
599 can be very variable between prokaryotes, ranging from 11% in *Mycoplasma* to 91% in *Firmicutes*  
600 (Chang *et al.*, 2006). Cortes et al (Cortes *et al.*, 2013) reported that the 55% of the genes transcribed  
601 with a 5' UTR lack the SD motif. These similarities between *M. smegmatis* and *M. tuberculosis*,  
602 along with the correlation of leader lengths for homologous genes between species shown in  
603 **Figure 3B**, provide further evidence that many transcriptomic features are conserved between

604 mycobacterial genomes. These data support the idea that in many cases, similar mechanisms  
605 govern modulation of gene expression in both species.

606 In an attempt to understand the role of RNA cleavage in mycobacteria, we identified and  
607 classified over 3,000 CSs throughout the *M. smegmatis* transcriptome, presenting the first report  
608 of an RNA cleavage map in mycobacteria. The most striking feature of the CSs was a cytidine in  
609 the +1 position, which was true in over 90% of the cases. While the RNases involved in global  
610 RNA decay in mycobacteria have not been yet elucidated, some studies have implicated RNase E  
611 as a major player in RNA processing and decay (Kovacs *et al.*, 2005, Zeller *et al.*, 2007, Csanadi  
612 *et al.*, 2009, Taverniti *et al.*, 2011), given its central role in other bacteria such as *E. coli* and its  
613 essentiality for survival in both *M. smegmatis* and Mtb (Sasseti *et al.*, 2003, Sasseti & Rubin,  
614 2003, Griffin *et al.*, 2011, Taverniti *et al.*, 2011, DeJesus *et al.*, 2017). It is therefore possible that  
615 mycobacterial RNase E, or other endonucleases with dominant roles, favor cytidine in the +1  
616 position. Interestingly, the sequence context of cleavage found here is different from that described  
617 for *E. coli*, for which the consensus sequence is (A/G)N↓AU (Mackie, 2013) or *S. enterica*, in  
618 which a marked preference for uridine at the +2 position and AU-rich sequences are important for  
619 RNase E cleavage (Chao *et al.*, 2017).

620 RNA cleavage is required for maturation of some mRNAs (Li & Deutscher, 1996, Condon  
621 *et al.*, 2001, Gutsell & Jain, 2010, Moores *et al.*, 2017). Therefore, the observation that CSs are  
622 enriched in 5' UTRs and intergenic regions suggests that processing may play roles in RNA  
623 maturation, stability, and translation for some transcripts in *M. smegmatis*. A high abundance of  
624 processing sites around the translation start site was also observed in *P. aeruginosa* and *S. enterica*  
625 in transcriptome-wide studies (Chao *et al.*, 2017, Gill *et al.*, 2018), suggesting that 5' UTR  
626 cleavage may be a widespread post-transcriptional mechanism for modulating gene expression in  
627 bacteria.

628 Regulation of RNA decay and processing plays a crucial role in adaptation to  
629 environmental changes. We present evidence showing that RNA cleavage is markedly reduced in  
630 conditions that result in growth cessation. It was previously demonstrated that in low oxygen  
631 concentrations mycobacteria reduce their RNA levels (Ignatov *et al.*, 2015) and mRNA half-life  
632 is strikingly increased (Rustad *et al.*, 2013), likely as a mechanism to maintain adequate transcript  
633 levels in the cell without the energy expenditures that continuous transcription would require.  
634 While several traits are involved in the regulation of transcript abundance and stability, the  
635 observation that cleavage events are pronouncedly reduced in these conditions pinpoint this  
636 mechanism as a potential way to control RNA stability under stress. In agreement with this  
637 hypothesis, RNase E was modestly but significantly decreased at the transcript level in early and  
638 late hypoxia (fold change = 0.63 and 0.56, respectively, *p*-value adjusted <0.05), suggesting that  
639 reducing the RNase E abundance in the cell may be a strategy to increase transcript half-life.  
640 Further study is needed to better understand the relationship between transcript processing and  
641 RNA decay in normoxic growth as well as stress conditions.

642 Hypoxic stress conditions were also characterized by major changes in the TSSs. 5'-end-  
643 mapping libraries revealed that over 300 TSSs varied substantially when cultures were limited in  
644 oxygen. We found that 56 transcripts triggered in hypoxia contain the SigF promoter binding  
645 motif, indicating that this sigma factor plays a substantial role in the *M. smegmatis* hypoxia  
646 response. While previous work revealed increased expression of SigF itself in hypoxia in Mtb

647 (Galagan *et al.*, 2013, Iona *et al.*, 2016, Yang *et al.*, 2018), this is the first report demonstrating the  
648 direct impact of SigF on specific promoters in hypoxic conditions in mycobacteria. Further work  
649 is needed to better understand the functional consequences of SigF activation in both organisms in  
650 response to hypoxia.

651

## 652 **ACKNOWLEDGEMENTS**

653 This work was supported by NSF CAREER award 1652756 to SSS. We are grateful to  
654 Zheyang Wu and Thomas Ioerger for helpful advice on the mixture modeling and Michael Chase  
655 for helpful advice on other aspects of our data analysis pipeline. We thank members of the Shell  
656 lab for technical assistance and helpful discussions. All Illumina sequencing was performed by the  
657 UMass Medical School Deep Sequencing Core.

658

659 **REFERENCES**

- 660
- 661 Adams PP, Flores Avile C, Popitsch N, Bilusic I, Schroeder R, Lybecker M & Jewett MW (2017) In vivo  
662 expression technology and 5' end mapping of the *Borrelia burgdorferi* transcriptome identify novel RNAs  
663 expressed during mammalian infection. *Nucleic acids research* **45**: 775-792.
- 664
- 665 Albrecht M, Sharma CM, Reinhardt R, Vogel J & Rudel T (2009) Deep sequencing-based discovery of the  
666 *Chlamydia trachomatis* transcriptome. *Nucleic acids research* **38**: 868-877.
- 667
- 668 Andre G, Even S, Putzer H, Burguiere P, Croux C, Danchin A, Martin-Verstraete I & Soutourina O (2008) S-  
669 box and T-box riboswitches and antisense RNA control a sulfur metabolic operon of *Clostridium*  
670 *acetobutylicum*. *Nucleic Acids Res* **36**: 5955-5969.
- 671
- 672 Arraiano CM, Andrade JM, Domingues S, *et al.* (2010) The critical role of RNA processing and degradation  
673 in the control of gene expression. *FEMS microbiology reviews* **34**: 883-923.
- 674
- 675 Bagchi G, Das TK & Tyagi JS (2002) Molecular analysis of the dormancy response in *Mycobacterium*  
676 *smegmatis*: expression analysis of genes encoding the DevR–DevS two-component system, Rv3134c and  
677 chaperone  $\alpha$ -crystallin homologues. *FEMS microbiology letters* **211**: 231-237.
- 678
- 679 Bailey TL & Machanick P (2012) Inferring direct DNA binding from ChIP-seq. *Nucleic Acids Res* **40**: e128.
- 680
- 681 Bailey TL, Johnson J, Grant CE & Noble WS (2015) The MEME Suite. *Nucleic Acids Res* **43**: W39-49.
- 682
- 683 Beaucher J, Rodrigue S, Jacques PE, Smith I, Brzezinski R & Gaudreau L (2002) Novel *Mycobacterium*  
684 *tuberculosis* anti-sigma factor antagonists control sigmaF activity by distinct mechanisms. *Mol Microbiol*  
685 **45**: 1527-1540.
- 686
- 687 Beaume M, Hernandez D, Farinelli L, Deluen C, Linder P, Gaspin C, Romby P, Schrenzel J & Francois P (2010)  
688 Cartography of methicillin-resistant *S. aureus* transcripts: detection, orientation and temporal expression  
689 during growth phase and stress conditions. *PLoS One* **5**: e10725.
- 690
- 691 Benaglia T, Chauveau D, Hunter DR & Young D (2009) mixtools: An R Package for Analyzing Finite Mixture  
692 Models. *Journal of Statistical Software* **32**: 1-29.
- 693
- 694 Berger P, Knödler M, Förstner KU, Berger M, Bertling C, Sharma CM, Vogel J, Karch H, Dobrindt U &  
695 Mellmann A (2016) The primary transcriptome of the *Escherichia coli* O104: H4 pAA plasmid and novel  
696 insights into its virulence gene expression and regulation. *Scientific reports* **6**: 35307.
- 697
- 698 Berney M, Greening C, Conrad R, Jacobs WR, Jr. & Cook GM (2014) An obligately aerobic soil bacterium  
699 activates fermentative hydrogen production to survive reductive stress during hypoxia. *Proceedings of the*  
700 *National Academy of Sciences of the United States of America* **111**: 11479-11484.
- 701
- 702 Chang B, Halgamuge S & Tang SL (2006) Analysis of SD sequences in completed microbial genomes: non-  
703 SD-led genes are as common as SD-led genes. *Gene* **373**: 90-99.
- 704
- 705 Chao Y, Li L, Girodat D, *et al.* (2017) In Vivo Cleavage Map Illuminates the Central Role of RNase E in Coding  
706 and Non-coding RNA Pathways. *Molecular cell* **65**: 39-51.



- 707 Condon C, Brechemier-Baey D, Beltchev B, Grunberg-Manago M & Putzer H (2001) Identification of the  
708 gene encoding the 5S ribosomal RNA maturase in *Bacillus subtilis*: mature 5S rRNA is dispensable for  
709 ribosome function. *RNA (New York, NY)* **7**: 242-253.
- 710
- 711 Coros A, Callahan B, Battaglioli E & Derbyshire KM (2008) The specialized secretory apparatus ESX-1 is  
712 essential for DNA transfer in *Mycobacterium smegmatis*. *Molecular microbiology* **69**: 794-808.
- 713
- 714 Cortes T, Schubert OT, Rose G, Arnvig KB, Comas I, Aebersold R & Young DB (2013) Genome-wide mapping  
715 of transcriptional start sites defines an extensive leaderless transcriptome in *Mycobacterium tuberculosis*.  
716 *Cell reports* **5**: 1121-1131.
- 717
- 718 Csanadi A, Faludi I & Miczak A (2009) MSMEG\_4626 ribonuclease from *Mycobacterium smegmatis*.  
719 *Molecular biology reports* **36**: 2341-2344.
- 720
- 721 Čuklina J, Hahn J, Imakaev M, Omasits U, Förstner KU, Ljubimov N, Goebel M, Pessi G, Fischer H-M &  
722 Ahrens CH (2016) Genome-wide transcription start site mapping of *Bradyrhizobium japonicum* grown  
723 free-living or in symbiosis—a rich resource to identify new transcripts, proteins and to study gene  
724 regulation. *BMC genomics* **17**: 302.
- 725
- 726 D'arrigo I, Bojanovič K, Yang X, Holm Rau M & Long KS (2016) Genome-wide mapping of transcription start  
727 sites yields novel insights into the primary transcriptome of *Pseudomonas putida*. *Environmental*  
728 *microbiology* **18**: 3466-3481.
- 729
- 730 de Groot A, Roche D, Fernandez B, Ludanyi M, Cruveiller S, Pignol D, Vallenet D, Armengaud J & Blanchard  
731 L (2014) RNA sequencing and proteogenomics reveal the importance of leaderless mRNAs in the radiation-  
732 tolerant bacterium *Deinococcus deserti*. *Genome biology and evolution* **6**: 932-948.
- 733
- 734 DeJesus MA, Gerrick ER, Xu W, *et al.* (2017) Comprehensive Essentiality Analysis of the *Mycobacterium*  
735 *tuberculosis* Genome via Saturating Transposon Mutagenesis. *MBio* **8**.
- 736
- 737 DiChiara JM, Contreras-Martinez LM, Livny J, Smith D, McDonough KA & Belfort M (2010) Multiple small  
738 RNAs identified in *Mycobacterium bovis* BCG are also expressed in *Mycobacterium tuberculosis* and  
739 *Mycobacterium smegmatis*. *Nucleic Acids Res* **38**: 4067-4078.
- 740
- 741 Dick T, Lee BH & Murugasu-Oei B (1998) Oxygen depletion induced dormancy in *Mycobacterium*  
742 *smegmatis*. *FEMS microbiology letters* **163**: 159-164.
- 743
- 744 Dinan AM, Tong P, Lohan AJ, Conlon KM, Miranda-CasoLuengo AA, Malone KM, Gordon SV & Loftus BJ  
745 (2014) Relaxed selection drives a noisy noncoding transcriptome in members of the *Mycobacterium*  
746 *tuberculosis* complex. *MBio* **5**: e01169-01114.
- 747
- 748 Elharar Y, Roth Z, Hermelin I, Moon A, Peretz G, Shenkerman Y, Vishkautzan M, Khalaila I & Gur E (2014)  
749 Survival of mycobacteria depends on proteasome-mediated amino acid recycling under nutrient  
750 limitation. *The EMBO journal* **33**: 1802-1814.
- 751
- 752 Fields CJ & Switzer RL (2007) Regulation of *pyr* gene expression in *Mycobacterium smegmatis* by PyrR-  
753 dependent translational repression. *J Bacteriol* **189**: 6236-6245.
- 754

- 755 Fozo EM, Kawano M, Fontaine F, Kaya Y, Mendieta KS, Jones KL, Ocampo A, Rudd KE & Storz G (2008)  
756 Repression of small toxic protein synthesis by the Sib and OhsC small RNAs. *Mol Microbiol* **70**: 1076-1093.  
757
- 758 Galagan JE, Minch K, Peterson M, *et al.* (2013) The Mycobacterium tuberculosis regulatory network and  
759 hypoxia. *Nature* **499**: 178-183.  
760
- 761 Gaudion A, Dawson L, Davis E & Smollett K (2013) Characterisation of the Mycobacterium tuberculosis  
762 alternative sigma factor SigG: its operon and regulon. *Tuberculosis (Edinburgh, Scotland)* **93**: 482-491.  
763
- 764 Gebhard S, Humpel A, McLellan AD & Cook GM (2008) The alternative sigma factor SigF of Mycobacterium  
765 smegmatis is required for survival of heat shock, acidic pH and oxidative stress. *Microbiology (Reading,*  
766 *England)* **154**: 2786-2795.  
767
- 768 Giangrossi M, Prosseda G, Tran CN, Brandi A, Colonna B & Falconi M (2010) A novel antisense RNA  
769 regulates at transcriptional level the virulence gene icsA of Shigella flexneri. *Nucleic Acids Res* **38**: 3362-  
770 3375.  
771
- 772 Gill EE, Chan LS, Winsor GL, *et al.* (2018) High-throughput detection of RNA processing in bacteria. *BMC*  
773 *Genomics* **19**: 223.  
774
- 775 Gomes AL, Abeel T, Peterson M, Azizi E, Lyubetskaya A, Carvalho L & Galagan J (2014) Decoding ChIP-seq  
776 with a double-binding signal refines binding peaks to single-nucleotides and predicts cooperative  
777 interaction. *Genome research* **24**: 1686-1697.  
778
- 779 Gray TA, Palumbo MJ & Derbyshire KM (2013) Draft Genome Sequence of MKD8, a Conjugal Recipient  
780 Mycobacterium smegmatis Strain. *Genome announcements* **1**: e0014813.  
781
- 782 Griffin JE, Gawronski JD, Dejesus MA, Ioerger TR, Akerley BJ & Sasseti CM (2011) High-resolution  
783 phenotypic profiling defines genes essential for mycobacterial growth and cholesterol catabolism. *PLoS*  
784 *pathogens* **7**: e1002251.  
785
- 786 Guell M, van Noort V, Yus E, *et al.* (2009) Transcriptome complexity in a genome-reduced bacterium.  
787 *Science (New York, NY)* **326**: 1268-1271.  
788
- 789 Gutgsell NS & Jain C (2010) Coordinated regulation of 23S rRNA maturation in Escherichia coli. *J Bacteriol*  
790 **192**: 1405-1409.  
791
- 792 Hartkoorn RC, Sala C, Magnet SJ, Chen JM, Pojer F & Cole ST (2010) Sigma factor F does not prevent  
793 rifampin inhibition of RNA polymerase or cause rifampin tolerance in Mycobacterium tuberculosis. *J*  
794 *Bacteriol* **192**: 5472-5479.  
795
- 796 Hayashi JM, Richardson K, Melzer ES, Sandler SJ, Aldridge BB, Siegrist MS & Morita YS (2018) Stress-  
797 induced reorganization of the mycobacterial membrane domain. *mBio* **9**: e01823-01817.  
798
- 799 Heidrich N, Bauriedl S, Barquist L, Li L, Schoen C & Vogel J (2017) The primary transcriptome of Neisseria  
800 meningitidis and its interaction with the RNA chaperone Hfq. *Nucleic acids research* **45**: 6147-6167.  
801

- 802 Heroven A, Sest M, Pisano F, Scheb-Wetzel M, Böhme K, Klein J, Münch R, Schomburg D & Dersch P (2012)  
803 Crp induces switching of the CsrB and CsrC RNAs in *Yersinia pseudotuberculosis* and links nutritional status  
804 to virulence. *Frontiers in cellular and infection microbiology* **2**: 158.  
805
- 806 Holmqvist E, Wright PR, Li L, Bischler T, Barquist L, Reinhardt R, Backofen R & Vogel J (2016) Global RNA  
807 recognition patterns of post-transcriptional regulators Hfq and CsrA revealed by UV crosslinking in vivo.  
808 **35**: 991-1011.  
809
- 810 Honaker RW, Leistikow RL, Bartek IL & Voskuil MI (2009) Unique roles of DosT and DosS in DosR regulon  
811 induction and *Mycobacterium tuberculosis* dormancy. *Infection and immunity* **77**: 3258-3263.  
812
- 813 Humpel A, Gebhard S, Cook GM & Berney M (2010) The SigF regulon in *Mycobacterium smegmatis* reveals  
814 roles in adaptation to stationary phase, heat, and oxidative stress. *J Bacteriol* **192**: 2491-2502.  
815
- 816 Ignatov DV, Salina EG, Fursov MV, Skvortsov TA, Azhikina TL & Kaprelyants AS (2015) Dormant non-  
817 culturable *Mycobacterium tuberculosis* retains stable low-abundant mRNA. *BMC Genomics* **16**: 954.  
818
- 819 Innocenti N, Golumbeanu M, Fouquier d'Herouel A, *et al.* (2015) Whole-genome mapping of 5' RNA ends  
820 in bacteria by tagged sequencing: a comprehensive view in *Enterococcus faecalis*. *RNA (New York, NY)* **21**:  
821 1018-1030.  
822
- 823 Iona E, Pardini M, Mustazzolu A, Piccaro G, Nisini R, Fattorini L & Giannoni F (2016) *Mycobacterium*  
824 *tuberculosis* gene expression at different stages of hypoxia-induced dormancy and upon resuscitation.  
825 *Journal of microbiology (Seoul, Korea)* **54**: 565-572.  
826
- 827 Jarmer H, Larsen TS, Krogh A, Saxild HH, Brunak S & Knudsen S (2001) Sigma A recognition sites in the  
828 *Bacillus subtilis* genome. *Microbiology (Reading, England)* **147**: 2417-2424.  
829
- 830 Jurėnaitė M, Markuckas A & Sužiedėlienė E (2013) Identification and characterization of type II toxin-  
831 antitoxin systems in the opportunistic pathogen *Acinetobacter baumannii*. *Journal of bacteriology* **JB**.  
832 00237-00213.  
833
- 834 Kawano M, Aravind L & Storz G (2007) An antisense RNA controls synthesis of an SOS-induced toxin  
835 evolved from an antitoxin. *Mol Microbiol* **64**: 738-754.  
836
- 837 Kovacs L, Csanadi A, Megyeri K, Kaberdin VR & Miczak A (2005) *Mycobacterial* RNase E-associated  
838 proteins. *Microbiology and immunology* **49**: 1003-1007.  
839
- 840 Kulesekara H, Lee V, Brenic A, Liberati N, Urbach J, Miyata S, Lee DG, Neely AN, Hyodo M & Hayakawa Y  
841 (2006) Analysis of *Pseudomonas aeruginosa* diguanylate cyclases and phosphodiesterases reveals a role  
842 for bis-(3'-5')-cyclic-GMP in virulence. *Proceedings of the National Academy of Sciences* **103**: 2839-2844.  
843
- 844 Lee JH, Karakousis PC & Bishai WR (2008) Roles of SigB and SigF in the *Mycobacterium tuberculosis* sigma  
845 factor network. *J Bacteriol* **190**: 699-707.  
846
- 847 Lee JH, Geiman DE & Bishai WR (2008) Role of stress response sigma factor SigG in *Mycobacterium*  
848 *tuberculosis*. *J Bacteriol* **190**: 1128-1133.  
849

- 850 Leistikow RL, Morton RA, Bartek IL, Frimpong I, Wagner K & Voskuil MI (2010) The Mycobacterium  
851 tuberculosis DosR regulon assists in metabolic homeostasis and enables rapid recovery from nonrespiring  
852 dormancy. *J Bacteriol* **192**: 1662-1670.  
853
- 854 Lewis DE & Adhya S (2004) Axiom of determining transcription start points by RNA polymerase in  
855 *Escherichia coli*. *Mol Microbiol* **54**: 692-701.  
856
- 857 Li H & Durbin R (2009) Fast and accurate short read alignment with Burrows-Wheeler transform.  
858 *Bioinformatics (Oxford, England)* **25**: 1754-1760.  
859
- 860 Li X, Mei H, Chen F, Tang Q, Yu Z, Cao X, Andongma BT, Chou S-H & He J (2017) Transcriptome landscape  
861 of *Mycobacterium smegmatis*. *Frontiers in microbiology* **8**: 2505.  
862
- 863 Li Z & Deutscher MP (1996) Maturation pathways for *E. coli* tRNA precursors: a random multienzyme  
864 process in vivo. *Cell* **86**: 503-512.  
865
- 866 Llorens-Rico V & Cano J (2016) Bacterial antisense RNAs are mainly the product of transcriptional noise.  
867 **2**: e1501363.  
868
- 869 Love MI, Huber W & Anders S (2014) Moderated estimation of fold change and dispersion for RNA-seq  
870 data with DESeq2. *Genome Biology* **15**: 550.  
871
- 872 Lun DS, Sherrid A, Weiner B, Sherman DR & Galagan JE (2009) A blind deconvolution approach to high-  
873 resolution mapping of transcription factor binding sites from CHIP-seq data. *Genome Biol* **10**: R142.  
874
- 875 Mackie GA (2013) RNase E: at the interface of bacterial RNA processing and decay. *Nature reviews*  
876 *Microbiology* **11**: 45-57.  
877
- 878 McKenzie JL, Robson J, Berney M, Smith TC, Ruthe A, Gardner PP, Arcus VL & Cook GM (2012) A VapBC  
879 toxin-antitoxin module is a posttranscriptional regulator of metabolic flux in mycobacteria. *J Bacteriol* **194**:  
880 2189-2204.  
881
- 882 Mendoza-Vargas A, Olvera L, Olvera M, *et al.* (2009) Genome-wide identification of transcription start  
883 sites, promoters and transcription factor binding sites in *E. coli*. *PLoS One* **4**: e7526.  
884
- 885 Michele TM, Ko C & Bishai WR (1999) Exposure to antibiotics induces expression of the *Mycobacterium*  
886 tuberculosis sigF gene: implications for chemotherapy against mycobacterial persistors. *Antimicrobial*  
887 *agents and chemotherapy* **43**: 218-225.  
888
- 889 Milano A, Forti F, Sala C, Riccardi G & Ghisotti D (2001) Transcriptional regulation of furA and katG upon  
890 oxidative stress in *Mycobacterium smegmatis*. *J Bacteriol* **183**: 6801-6806.  
891
- 892 Mitschke J, Georg J, Scholz I, Sharma CM, Dienst D, Bantscheff J, Voß B, Steglich C, Wilde A & Vogel J (2011)  
893 An experimentally anchored map of transcriptional start sites in the model cyanobacterium *Synechocystis*  
894 sp. PCC6803. *Proceedings of the National Academy of Sciences* **108**: 2124-2129.  
895
- 896 Moores A, Riesco AB, Schwenk S & Arnvig KB (2017) Expression, maturation and turnover of DrrS, an  
897 unusually stable, DosR regulated small RNA in *Mycobacterium tuberculosis*. **12**: e0174079.

898  
899 Morita T, Maki K & Aiba H (2005) RNase E-based ribonucleoprotein complexes: mechanical basis of mRNA  
900 destabilization mediated by bacterial noncoding RNAs. *Genes & development* **19**: 2176-2186.  
901  
902 Mraheil MA, Billion A, Mohamed W, Mukherjee K, Kuenne C, Pischmarov J, Krawitz C, Retey J, Hartsch T  
903 & Chakraborty T (2011) The intracellular sRNA transcriptome of *Listeria monocytogenes* during growth in  
904 macrophages. *Nucleic acids research* **39**: 4235-4248.  
905  
906 Newton-Foot M & Gey van Pittius NC (2013) The complex architecture of mycobacterial promoters.  
907 *Tuberculosis (Edinburgh, Scotland)* **93**: 60-74.  
908  
909 Novichkov PS, Kazakov AE, Ravcheev DA, *et al.* (2013) RegPrecise 3.0--a resource for genome-scale  
910 exploration of transcriptional regulation in bacteria. *BMC Genomics* **14**: 745.  
911  
912 O'Toole R, Smeulders MJ, Blokpoel MC, Kay EJ, Loughheed K & Williams HD (2003) A two-component  
913 regulator of universal stress protein expression and adaptation to oxygen starvation in *Mycobacterium*  
914 *smegmatis*. *Journal of bacteriology* **185**: 1543-1554.  
915  
916 Paletta JL & Ohman DE (2012) Evidence for two promoters internal to the alginate biosynthesis operon in  
917 *Pseudomonas aeruginosa*. *Current microbiology* **65**: 770-775.  
918  
919 Park HD, Guinn KM, Harrell MI, Liao R, Voskuil MI, Tompa M, Schoolnik GK & Sherman DR (2003)  
920 Rv3133c/dosR is a transcription factor that mediates the hypoxic response of *Mycobacterium*  
921 *tuberculosis*. *Molecular microbiology* **48**: 833-843.  
922  
923 Pecsí I, Hards K, Ekanayaka N, Berney M, Hartman T, Jacobs WR & Cook GM (2014) Essentiality of succinate  
924 dehydrogenase in *Mycobacterium smegmatis* and its role in the generation of the membrane potential  
925 under hypoxia. *MBio* **5**: e01093-01014.  
926  
927 Potgieter MG, Nakedi KC, Ambler JM, Nel AJ, Garnett S, Soares NC, Mulder N & Blackburn JM (2016)  
928 Proteogenomic Analysis of *Mycobacterium smegmatis* using high resolution mass spectrometry. *Frontiers*  
929 *in microbiology* **7**: 427.  
930  
931 Prasanna AN & Mehra S (2013) Comparative phylogenomics of pathogenic and non-pathogenic  
932 mycobacterium. *PLoS One* **8**: e71248.  
933  
934 Raju RM, Unnikrishnan M, Rubin DH, Krishnamoorthy V, Kandror O, Akopian TN, Goldberg AL & Rubin EJ  
935 (2012) *Mycobacterium tuberculosis* ClpP1 and ClpP2 function together in protein degradation and are  
936 required for viability in vitro and during infection. *PLoS pathogens* **8**: e1002511.  
937  
938 Ramachandran VK, Shearer N & Thompson A (2014) The primary transcriptome of *Salmonella enterica*  
939 serovar Typhimurium and its dependence on ppGpp during late stationary phase. *PLoS One* **9**: e92690.  
940  
941 Raman S, Hazra R, Dascher CC & Husson RN (2004) Transcription regulation by the *Mycobacterium*  
942 *tuberculosis* alternative sigma factor SigD and its role in virulence. *J Bacteriol* **186**: 6605-6616.  
943



- 944 Raman S, Song T, Puyang X, Bardarov S, Jacobs WR, Jr. & Husson RN (2001) The alternative sigma factor  
945 SigH regulates major components of oxidative and heat stress responses in *Mycobacterium tuberculosis*.  
946 *J Bacteriol* **183**: 6119-6125.  
947
- 948 Rigel NW, Gibbons HS, McCann JR, McDonough JA, Kurtz S & Braunstein M (2009) The accessory SecA2  
949 system of mycobacteria requires ATP binding and the canonical SecA1. *Journal of Biological Chemistry*  
950 **284**: 9927-9936.  
951
- 952 Roberts DM, Liao RP, Wisedchaisri G, Hol WG & Sherman DR (2004) Two sensor kinases contribute to the  
953 hypoxic response of *Mycobacterium tuberculosis*. *The Journal of biological chemistry* **279**: 23082-23087.  
954
- 955 Robson J, McKenzie JL, Cursons R, Cook GM & Arcus VL (2009) The vapBC operon from *Mycobacterium*  
956 *smegmatis* is an autoregulated toxin-antitoxin module that controls growth via inhibition of translation.  
957 *Journal of molecular biology* **390**: 353-367.  
958
- 959 Rodrigue S, Brodeur J, Jacques PE, Gervais AL, Brzezinski R & Gaudreau L (2007) Identification of  
960 mycobacterial sigma factor binding sites by chromatin immunoprecipitation assays. *J Bacteriol* **189**: 1505-  
961 1513.  
962
- 963 Rosenkrands I, Slayden RA, Crawford J, Aagaard C, Clifton III E & Andersen P (2002) Hypoxic response of  
964 *Mycobacterium tuberculosis* studied by metabolic labeling and proteome analysis of cellular and  
965 extracellular proteins. *Journal of bacteriology* **184**: 3485-3491.  
966
- 967 Rustad TR, Harrell MI, Liao R & Sherman DR (2008) The enduring hypoxic response of *Mycobacterium*  
968 *tuberculosis*. *PloS one* **3**: e1502.  
969
- 970 Rustad TR, Minch KJ, Brabant W, Winkler JK, Reiss DJ, Baliga NS & Sherman DR (2013) Global analysis of  
971 mRNA stability in *Mycobacterium tuberculosis*. *Nucleic Acids Res* **41**: 509-517.  
972
- 973 Sala C, Forti F, Magnoni F & Ghisotti D (2008) The katG mRNA of *Mycobacterium tuberculosis* and  
974 *Mycobacterium smegmatis* is processed at its 5' end and is stabilized by both a polypurine sequence and  
975 translation initiation. *BMC molecular biology* **9**: 33.  
976
- 977 Sass AM, Van Acker H, Förstner KU, Van Nieuwerburgh F, Deforce D, Vogel J & Coenye T (2015) Genome-  
978 wide transcription start site profiling in biofilm-grown *Burkholderia cenocepacia* J2315. *BMC genomics* **16**:  
979 775.  
980
- 981 Sasseti CM & Rubin EJ (2003) Genetic requirements for mycobacterial survival during infection.  
982 *Proceedings of the National Academy of Sciences of the United States of America* **100**: 12989-12994.  
983
- 984 Sasseti CM, Boyd DH & Rubin EJ (2003) Genes required for mycobacterial growth defined by high density  
985 mutagenesis. *Mol Microbiol* **48**: 77-84.  
986
- 987 Schifano JM, Edifor R, Sharp JD, Ouyang M, Konkimalla A, Husson RN & Woychik NA (2013) Mycobacterial  
988 toxin MazF-mt6 inhibits translation through cleavage of 23S rRNA at the ribosomal A site. *Proceedings of*  
989 *the National Academy of Sciences* **110**: 8501-8506.  
990

- 991 Schlüter J-P, Reinkensmeier J, Barnett MJ, Lang C, Krol E, Giegerich R, Long SR & Becker A (2013) Global  
992 mapping of transcription start sites and promoter motifs in the symbiotic  $\alpha$ -proteobacterium  
993 *Sinorhizobium meliloti* 1021. *BMC genomics* **14**: 156.  
994
- 995 Shao W, Price MN, Deutschbauer AM, Romine MF & Arkin AP (2014) Conservation of transcription start  
996 sites within genes across a bacterial genus. *MBio* **5**: e01398-01314.  
997
- 998 Sharma CM, Hoffmann S, Darfeuille F, *et al.* (2010) The primary transcriptome of the major human  
999 pathogen *Helicobacter pylori*. *Nature* **464**: 250-255.  
1000
- 1001 Shell SS, Chase MR, Ioerger TR & Fortune SM (2015) RNA sequencing for transcript 5'-end mapping in  
1002 mycobacteria. *Methods in molecular biology (Clifton, NJ)* **1285**: 31-45.  
1003
- 1004 Shell SS, Wang J, Lapierre P, Mir M, Chase MR, Pyle MM, Gawande R, Ahmad R, Sarracino DA & Ioerger TR  
1005 (2015) Leaderless transcripts and small proteins are common features of the mycobacterial translational  
1006 landscape. *PLoS genetics* **11**: e1005641.  
1007
- 1008 Singh AK & Singh BN (2008) Conservation of sigma F in mycobacteria and its expression in *Mycobacterium*  
1009 *smegmatis*. *Current microbiology* **56**: 574-580.  
1010
- 1011 Singh AK, Dutta D, Singh V, Srivastava V, Biswas RK & Singh BN (2015) Characterization of *Mycobacterium*  
1012 *smegmatis* sigF mutant and its regulon: overexpression of SigF antagonist (MSMEG\_1803) in *M.*  
1013 *smegmatis* mimics sigF mutant phenotype, loss of pigmentation, and sensitivity to oxidative stress.  
1014 *MicrobiologyOpen* **4**: 896-916.  
1015
- 1016 Skliarova SA, Kreneva RA, Perumov DA & Mironov AS (2012) [The characterization of internal promoters  
1017 in the *Bacillus subtilis* riboflavin biosynthesis operon]. *Genetika* **48**: 1133-1141.  
1018
- 1019 Song T, Song SE, Raman S, Anaya M & Husson RN (2008) Critical role of a single position in the -35 element  
1020 for promoter recognition by *Mycobacterium tuberculosis* SigE and SigH. *J Bacteriol* **190**: 2227-2230.  
1021
- 1022 Sun R, Converse PJ, Ko C, Tyagi S, Morrison NE & Bishai WR (2004) *Mycobacterium tuberculosis* ECF sigma  
1023 factor sigC is required for lethality in mice and for the conditional expression of a defined gene set. *Mol*  
1024 *Microbiol* **52**: 25-38.  
1025
- 1026 Taverniti V, Forti F, Ghisotti D & Putzer H (2011) *Mycobacterium smegmatis* RNase J is a 5'-3' exo-  
1027 /endoribonuclease and both RNase J and RNase E are involved in ribosomal RNA maturation. *Mol*  
1028 *Microbiol* **82**: 1260-1276.  
1029
- 1030 Thomason MK, Bischler T, Eisenbart SK, Förstner KU, Zhang A, Herbig A, Nieselt K, Sharma CM & Storz G  
1031 (2015) Global transcriptional start site mapping using differential RNA sequencing reveals novel antisense  
1032 RNAs in *Escherichia coli*. *Journal of bacteriology* **197**: 18-28.  
1033
- 1034 Trauner A, Loughheed KE, Bennett MH, Hingley-Wilson SM & Williams HD (2012) The dormancy regulator  
1035 DosR controls ribosome stability in hypoxic mycobacteria. *Journal of Biological Chemistry jbc.* M112.  
1036 364851.  
1037

- 1038 Veyrier F, Said-Salim B & Behr MA (2008) Evolution of the mycobacterial SigK regulon. *J Bacteriol* **190**:  
1039 1891-1899.  
1040
- 1041 Warner DF, Savvi S, Mizrahi V & Dawes SS (2007) A riboswitch regulates expression of the coenzyme B12-  
1042 independent methionine synthase in *Mycobacterium tuberculosis*: implications for differential  
1043 methionine synthase function in strains H37Rv and CDC1551. *J Bacteriol* **189**: 3655-3659.  
1044
- 1045 Wayne LG & Hayes LG (1996) An in vitro model for sequential study of shiftdown of *Mycobacterium*  
1046 *tuberculosis* through two stages of nonreplicating persistence. *Infection and immunity* **64**: 2062-2069.  
1047
- 1048 Winther K, Tree JJ, Tollervey D & Gerdes K (2016) VapCs of *Mycobacterium tuberculosis* cleave RNAs  
1049 essential for translation. *Nucleic Acids Res* **44**: 9860-9871.  
1050
- 1051 Wittchen M, Busche T, Gaspar AH, Lee JH, Ton-That H, Kalinowski J & Tauch A (2018) Transcriptome  
1052 sequencing of the human pathogen *Corynebacterium diphtheriae* NCTC 13129 provides detailed insights  
1053 into its transcriptional landscape and into DtxR-mediated transcriptional regulation. *BMC Genomics* **19**:  
1054 82.  
1055
- 1056 Wu M-L, Gengenbacher M & Dick T (2016) Mild nutrient starvation triggers the development of a small-  
1057 cell survival morphotype in mycobacteria. *Frontiers in microbiology* **7**: 947.  
1058
- 1059 Yang H, Sha W, Liu Z, *et al.* (2018) Lysine acetylation of DosR regulates the hypoxia response of  
1060 *Mycobacterium tuberculosis*. *Emerging microbes & infections* **7**: 34.  
1061
- 1062 Zeller ME, Csanadi A, Miczak A, Rose T, Bizebard T & Kaberdin VR (2007) Quaternary structure and  
1063 biochemical properties of mycobacterial RNase E/G. *The Biochemical journal* **403**: 207-215.  
1064
- 1065 Zhu Y, Mao C, Ge X, Wang Z, Lu P, Zhang Y, Chen S & Hu Y (2017) Characterization of a Minimal Type of  
1066 Promoter Containing the -10 Element and a Guanine at the -14 or -13 Position in *Mycobacteria*. *J Bacteriol*  
1067 **199**.  
1068
- 1069 Zhukova A, Fernandes LG, Hugon P, *et al.* (2017) Genome-Wide Transcriptional Start Site Mapping and  
1070 sRNA Identification in the Pathogen *Leptospira interrogans*. *Front Cell Infect Microbiol* **7**: 10.  
1071

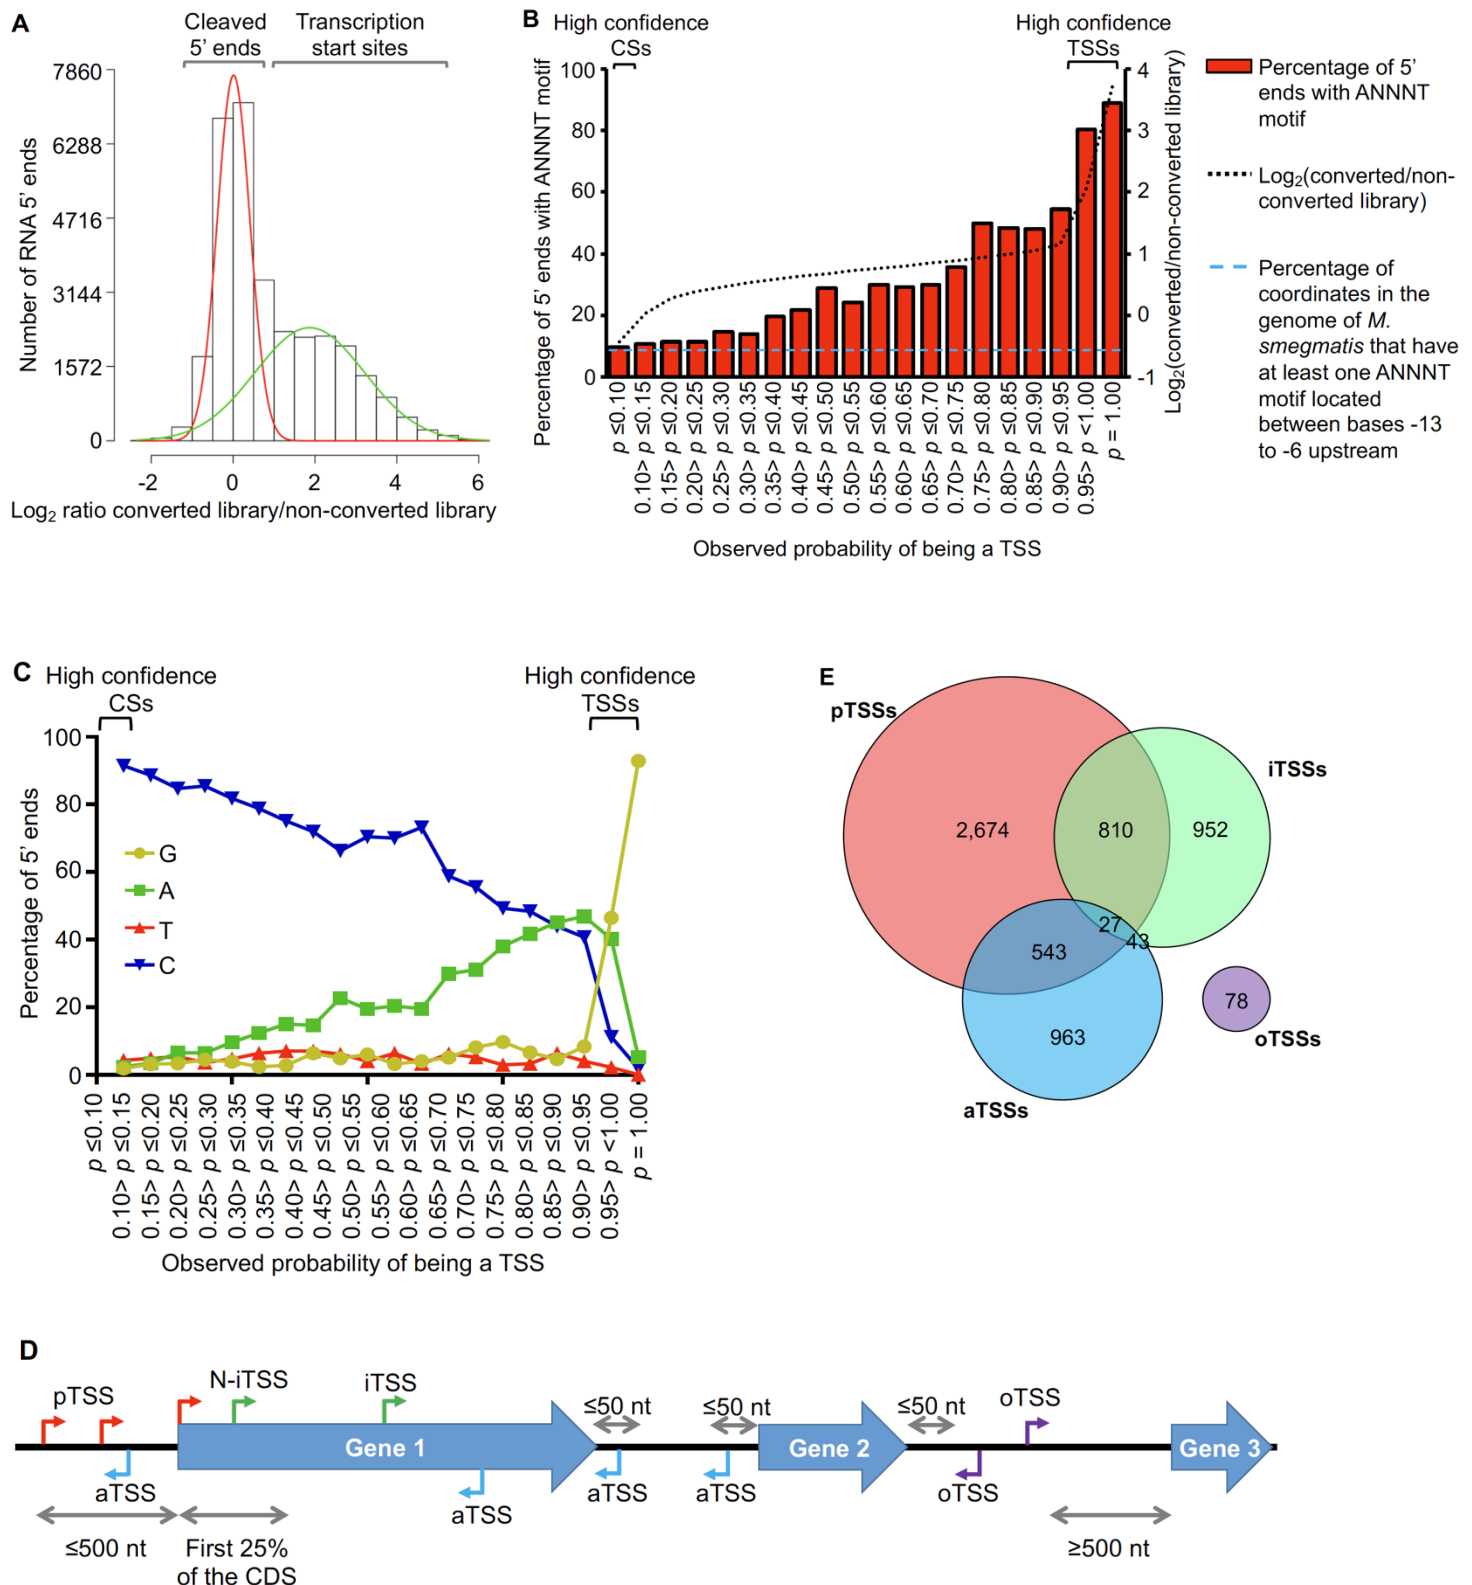

**Figure 1. Mapping and categorization of transcription start sites in *M. smegmatis*.** **A)** Diagram showing the ratios of coverage in the converted/non-converted libraries for each coordinate. Gaussian mixture modeling was used to discriminate between TSSs and CSs. For this analysis, the 15,720 coordinates from Dataset 1 were used. **B)** Abundance of the ANNNT promoter motif located between bases -13 to -6 upstream of the 15,720 coordinates. The light blue dashed line indicates the percentage of coordinates in the genome of *M. smegmatis* that have at least one ANNNT motif located between bases

-13 to -6 upstream (9.7%). **C)** Base frequency at the +1 position among the 15,720 5' ends from Dataset 1. Probabilities of a 5' end being a TSS were calculated by Gaussian Mixture modeling. **D)** Categories for TSS annotation based on the genomic context. TSSs were classified according to their relative position to genes as primary (red), internal (green), antisense (light blue) and orphan (violet). **E)** Distribution of TSSs among the different categories.



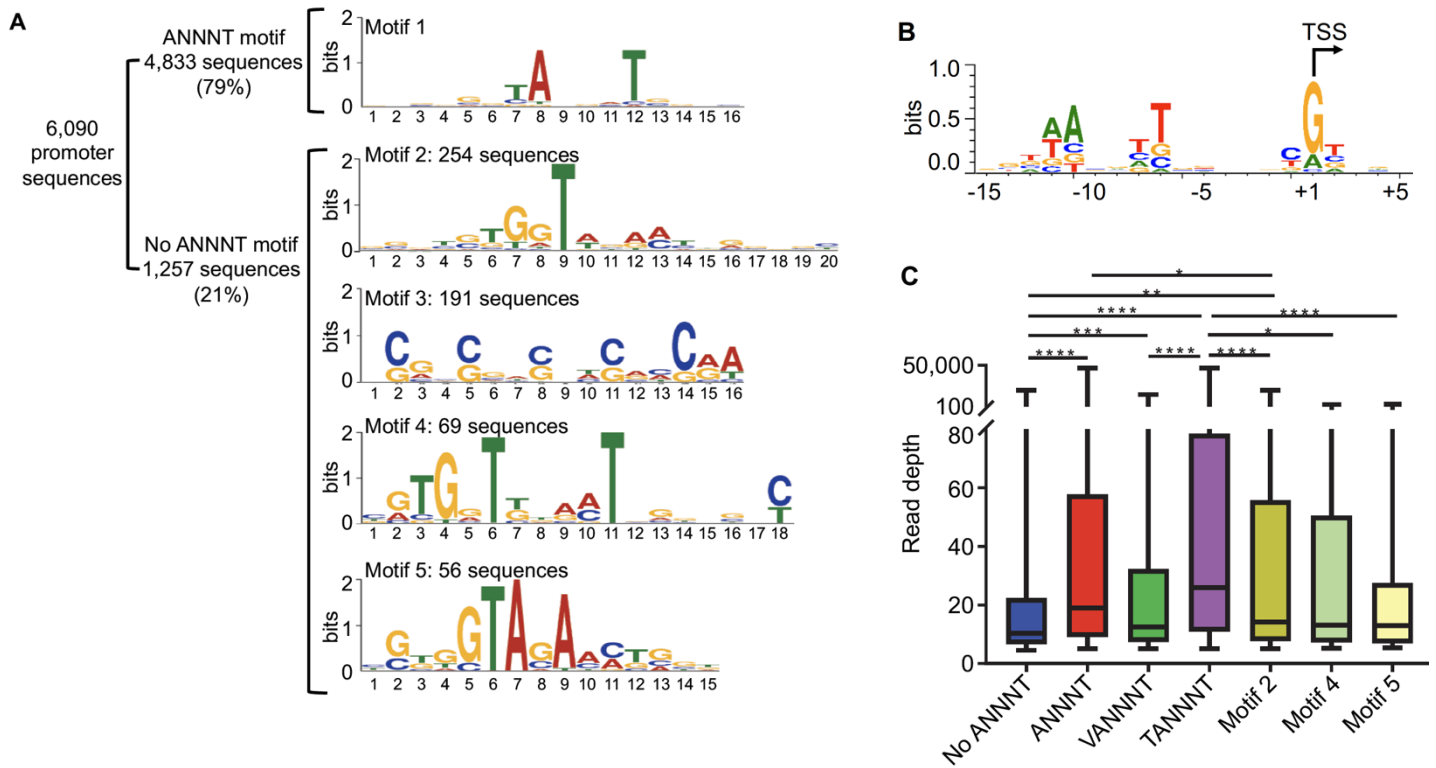

**Figure 2. *M. smegmatis* promoter -10 regions are dominated by the ANNNT motif. A)** Identification of promoter motifs. Consensus motifs were identified by using MEME. The 20 nt upstream the 6,090 TSSs were used for the initial analysis. Those sequences lacking an ANNNT -10 motif between positions -13 and -6 (1,257) were used to identify other conserved promoter sequences. Motif 2 (20 nt length) and Motif 4 (18 nt length) are located immediately upstream of the TSS (at the -1 position), while the spacing of Motif 5 varies from -4 to -1 relative to the TSS, with -3 being the dominant position (75% of the motifs). **B)** The sequences flanking 3,500 randomly chosen TSSs were used to create a sequence logo by WebLogo 3 (Crooks et al, 2004), revealing the two dominant spacings for the ANNNT motif and base preferences in the immediate vicinity of the TSS. **C)** Comparison of apparent promoter activity for different motifs. Mean normalized read depth in the converted libraries from Dataset 1 was compared for TSSs having or lacking the ANNNT motif in the -10 region, and ANNNT-associated TSSs were further subdivided into those containing the extended TANNNT motif or conversely the VANNNT sequence (where V = A, G or C). Motifs 2, 4 and 5 in Figure 2A are also included. \*\*\*\*p < 0.0001, \*\*\*p < 0.001, \*\*p < 0.01, \*p < 0.05 (Kruskal-Wallis test with post-test for multiple comparisons).

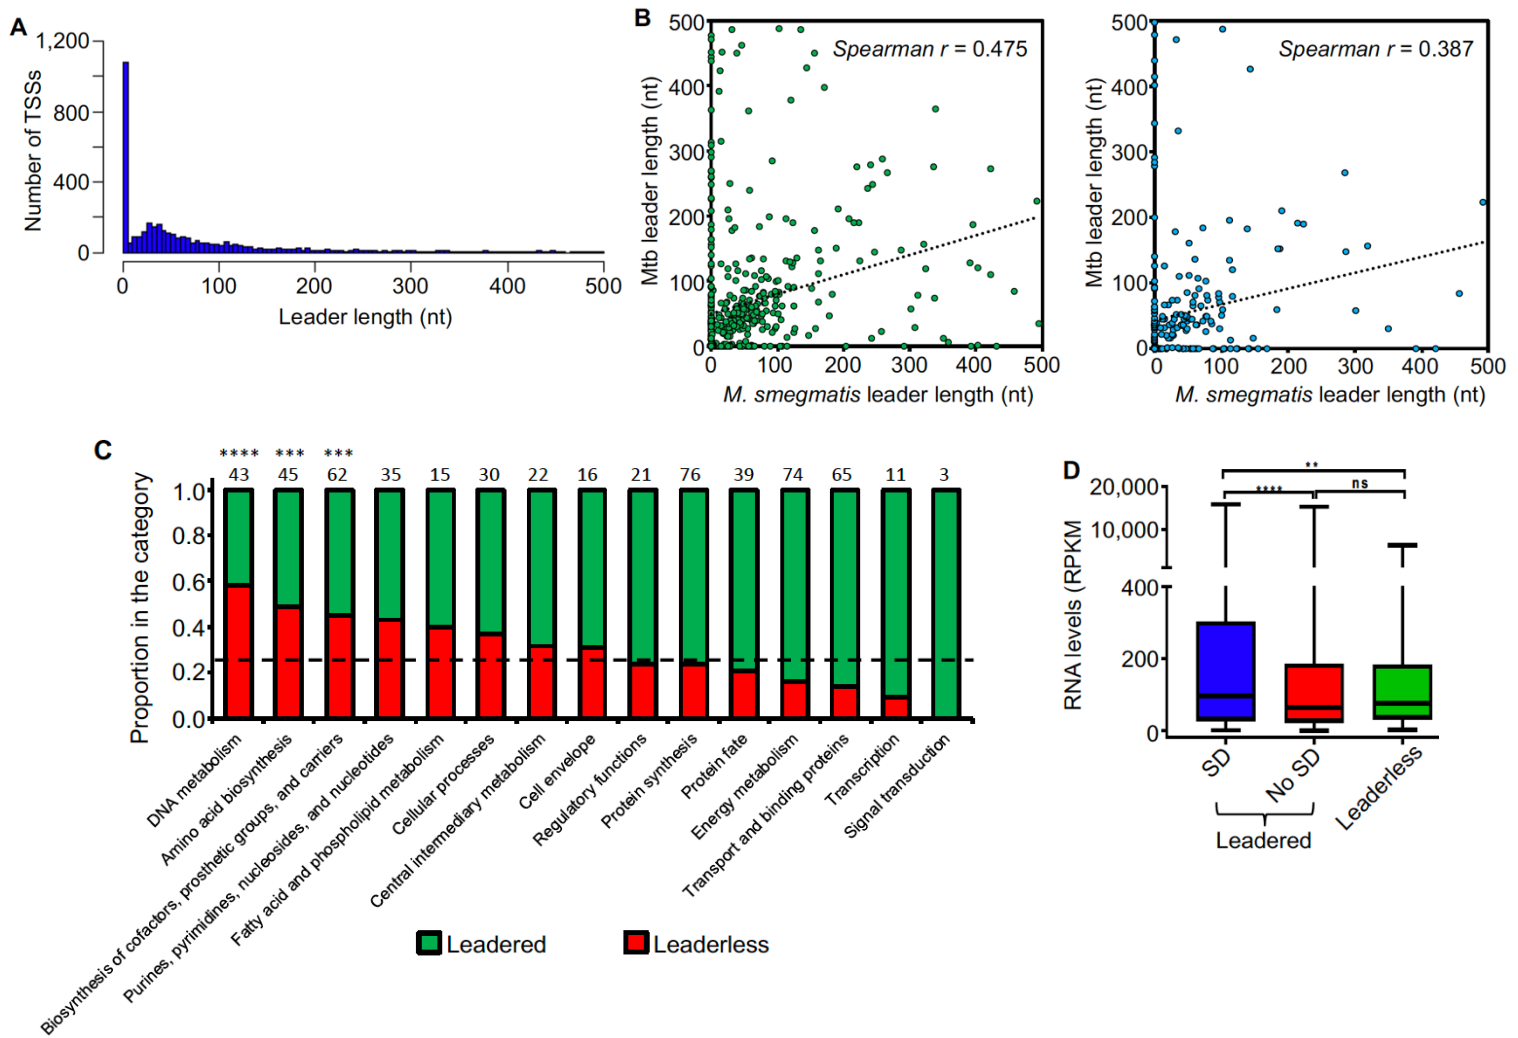

**Figure 3. Leader features are conserved in mycobacteria.** **A)** Leader length distribution. The 4,054 pTSSs and the pTSSs of the 213 reannotated genes (N-iTSSs→pTSSs) were used for this analysis. **B)** Leader length correlation between *M. smegmatis* and Mtb genes. The leader sequences of genes having a single unique pTSS in both species (leader length  $\geq 0$  and  $\leq 500$  nt) were used for this analysis. 508 homologous genes in Cortes et al, 2013 (left figure) and 251 homologous genes in Shell et al, 2015 (right figure) were used. When a gene in *M. smegmatis* had more than one homolog in Mtb, that with the highest identity was considered. Spearman  $r$   $p$ -value  $< 0.00001$  in both cases. **C)** Distribution of leaderless transcripts among different functional TIGRfam functional categories. A total of 557 genes having a TIGRfam category were used for this analysis. Genes having both leadered and leaderless transcripts were excluded from this analysis. The black dashed line indicates the expected proportion of leaderless genes (25%) according to the global analysis performed in this study. The numbers above each bar indicate the total number of genes used for this analysis in each category (leaderless + leadered). \*\*\*\* $p < 0.0001$ , \*\*\* $p < 0.001$  (Chi-Square test with Bonferroni correction for multiple comparisons). **D)** RNA levels vary according to leader status. Mean expression levels were compared for genes expressed with leaders containing a canonical SD sequence (SD) or not (No SD) or lacking leaders (leaderless). Gene expression was quantified as RPKMs using RNAseq expression data. Genes were classified as containing an SD sequence if at least one of the three tetramers AGGA, GGAG or GAGG (core sequence AGGAGG) were present in the region -6 to -17 nt relative to the start codon. rRNAs, tRNAs, sRNAs, and genes expressed as both leadered and leaderless transcripts were excluded from this analysis. \*\*\*\* $p < 0.0001$ ; \*\* $p < 0.005$ ; ns: not significant. (Kruskal-Wallis test with post-test for multiple comparisons).

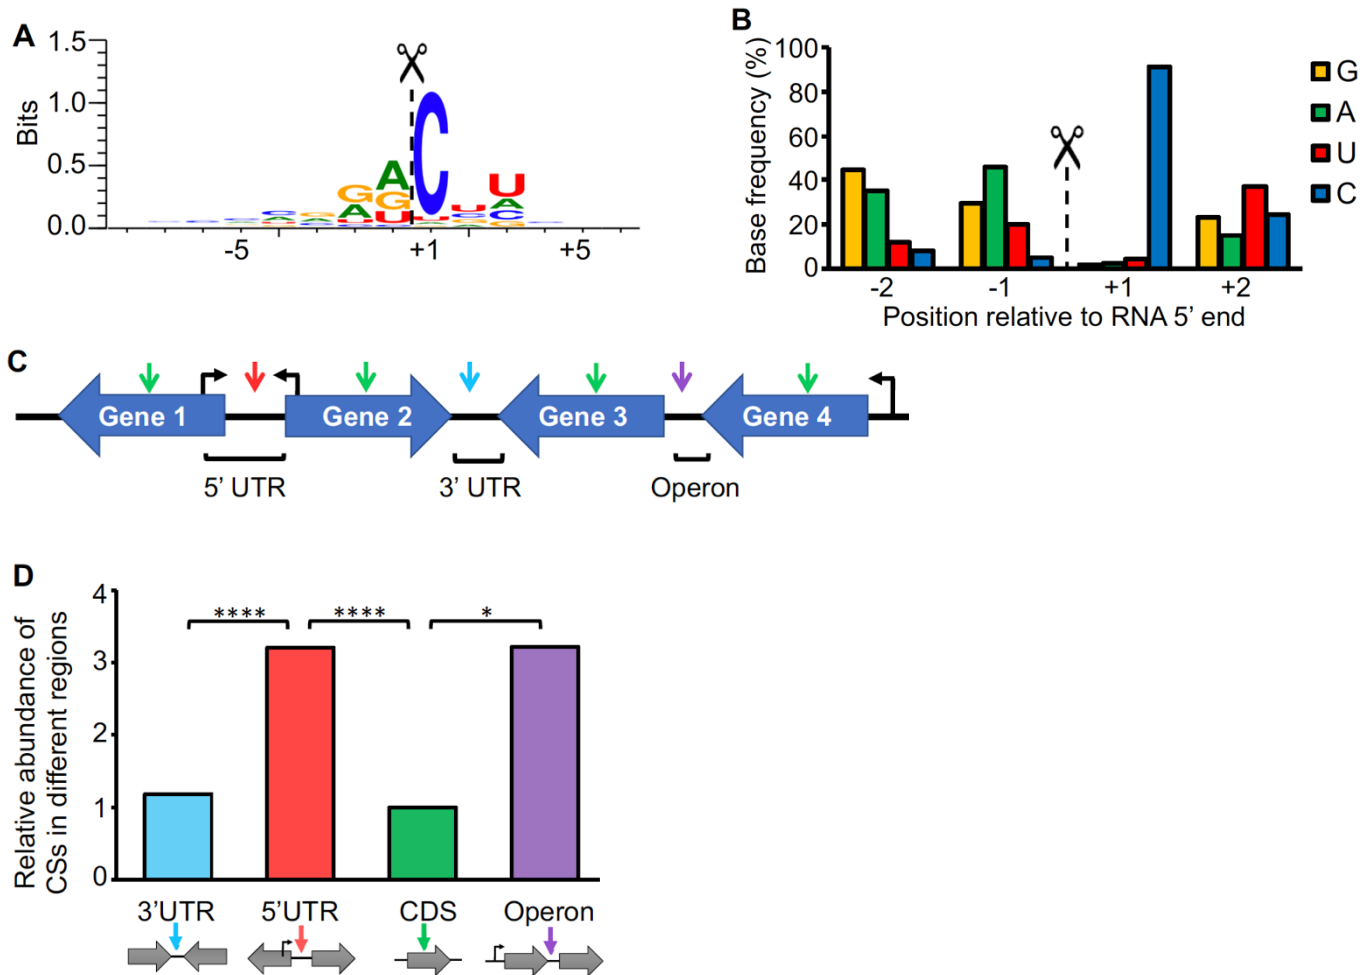

**Figure 4. Cleavage site positions are biased with respect to sequence context and genetic location.** **A)** Sequence context of cleavage sites. The sequences flanking the 3,344 high-confidence CSs were used to create the sequence logo with WebLogo 3 (Crooks et al, 2004). **B)** Base preference for RNA cleavage. The base frequencies for the -2 to +2 positions were determined. **C)** Cleavage site categories based on the genetic context. CSs are denoted with arrows. 5' UTR: the CS is within the leader of a gene, and the genes upstream and downstream of the CS are divergent (Gene 1 and Gene 2, red arrow). CDS: The CS is within a coding sequence (green arrow). 3' UTR: the genes upstream and downstream of the CS are convergent (Gene 2 and Gene 3, light blue arrow). Operon: The CS is between two genes with the same orientation and the first gene in the operon has a pTSS according to Table S5 (violet arrow). **D)** Distribution of cleavage sites. The frequency of CSs in each location was normalized to the proportion of the genome that the location category comprised. The proportions were then normalized to the CDS category, which was set as 1. \*\*\*\* $p < 0.0001$ , \* $p < 0.01$  (Chi-square test).

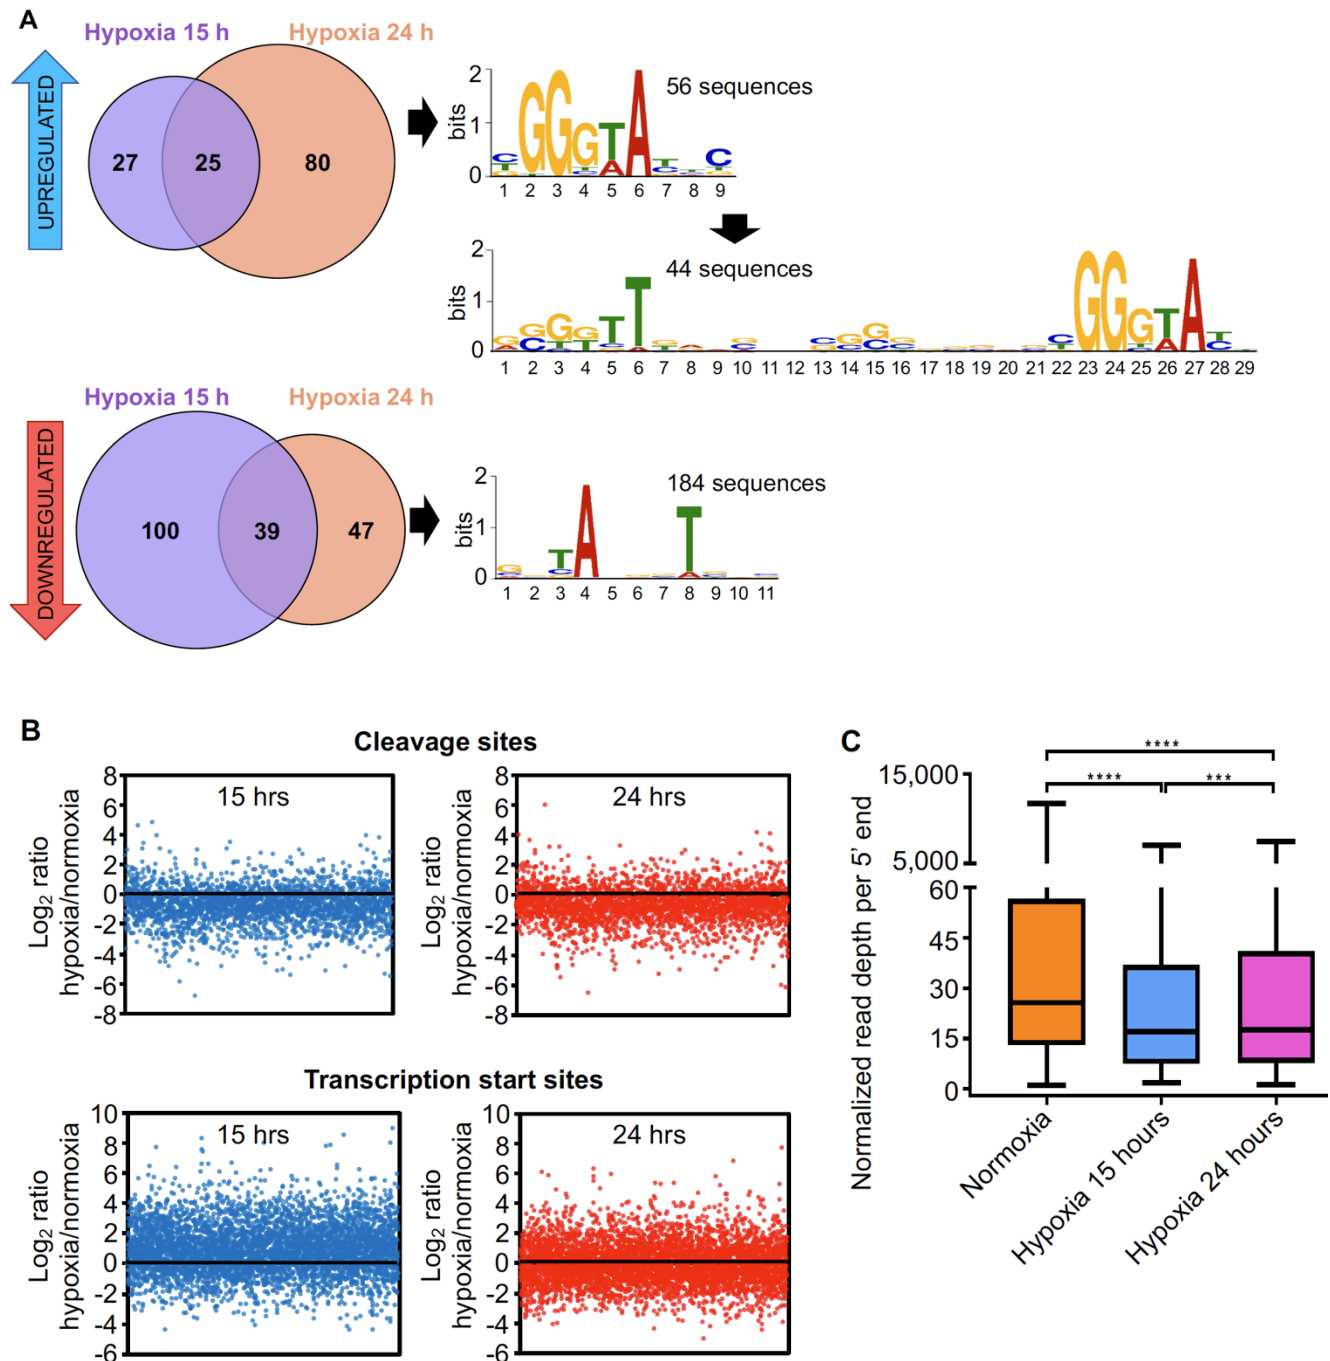

**Figure 5. The transcriptional landscape substantially changes upon oxygen limitation. A)** TSSs significantly increased or decreased in hypoxia. 132 TSSs were overrepresented (upper panel) and 186 were underrepresented (lower panel) in different hypoxia stages. The upstream regions of these TSSs were used to search for promoter motifs using MEME. **B)** The mean normalized read depths for each 5' end in the non-converted libraries were compared between hypoxia and normoxia. Graphics show the Log<sub>2</sub> of the ratios of read depth for each CSs at 15 h (upper left) and 24 h (upper right), and the Log<sub>2</sub> of the ratios of the read depth for each TSSs at 15 h (lower left) and 24 h (lower right) compared to normoxia. **C)** Normalized read depth at high-confidence cleavage sites under normoxia and the transition into hypoxia. \*\*\*\*p < 0.0001, \*\*\*p < 0.001, ns: not significant (Non-parametric Wilcoxon matched-pairs signed rank test).

## Supplementary Figures

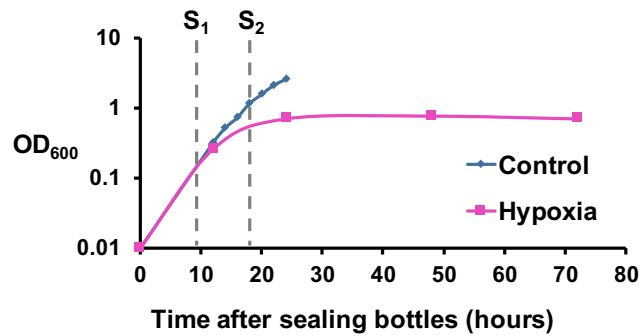

**Supplementary Figure 1. Wayne hypoxia model.** Cultures were grown in sealed flasks to produce a gradual reduction in oxygen. Samples were taken at 15 (S<sub>1</sub>) and 24 (S<sub>2</sub>) hours after bottles were sealed. For control, cultures were sampled at an OD = 0.8.



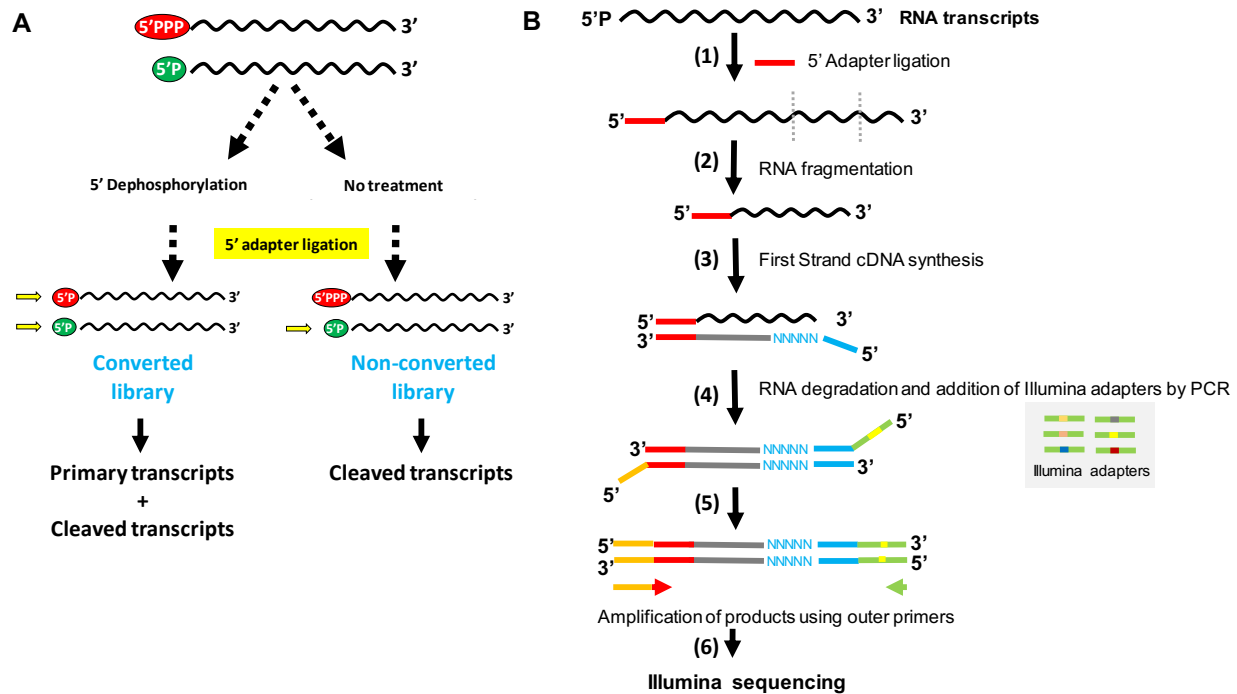

**Figure S2. Construction of 5'-end-directed libraries. A)** RNA samples were split in two parts and treated differentially. RNA for Library 1 (converted) was treated with RPPH to convert triphosphates in monophosphates, allowing the capture of 5' end that are primary transcripts or cleaved RNAs. RNA for Library 2 (non-converted) was mock-treated, allowing the capture of cleaved transcripts. **B)** Workflow of 5'-end-directed libraries. After RPPH or 5' polyphosphatase treatment, adapter SSS392 (TCCCTACACGACGCTCTTCCGAUCU) was ligated to the 5' monophosphate ends (1). Then, RNA was fragmented by heating at 85°C for 6 min (log phase experiment) or at 94°C for 11 min (hypoxia experiment) (2) and first strand cDNA synthesis was carried out using the degenerate primer SSS397 (CTGGAGTTCAGACGTGTGCTCTTCCGATCTNNNNNN) (3). RNA was then degraded and DNA was amplified using universal adapter sequence SSS398 (AATGATACGGCGACCACCGAGATCTACACTCTTTCCCTACACGACGCTCTTC) and primers bearing Illumina indexes (4). Adapter-bearing products were PCR-amplified using outer primers SSS401 (AATGATACGGCGACCACCGAGATC) and SSS402 (CAAGCAGAAGACGGCATAACGAGAT) to enrich for full-length fragments. 4 (log phase experiment) or 16 (hypoxia experiment) PCR cycles were performed (5). Finally, libraries were sequenced using Illumina technology (6).

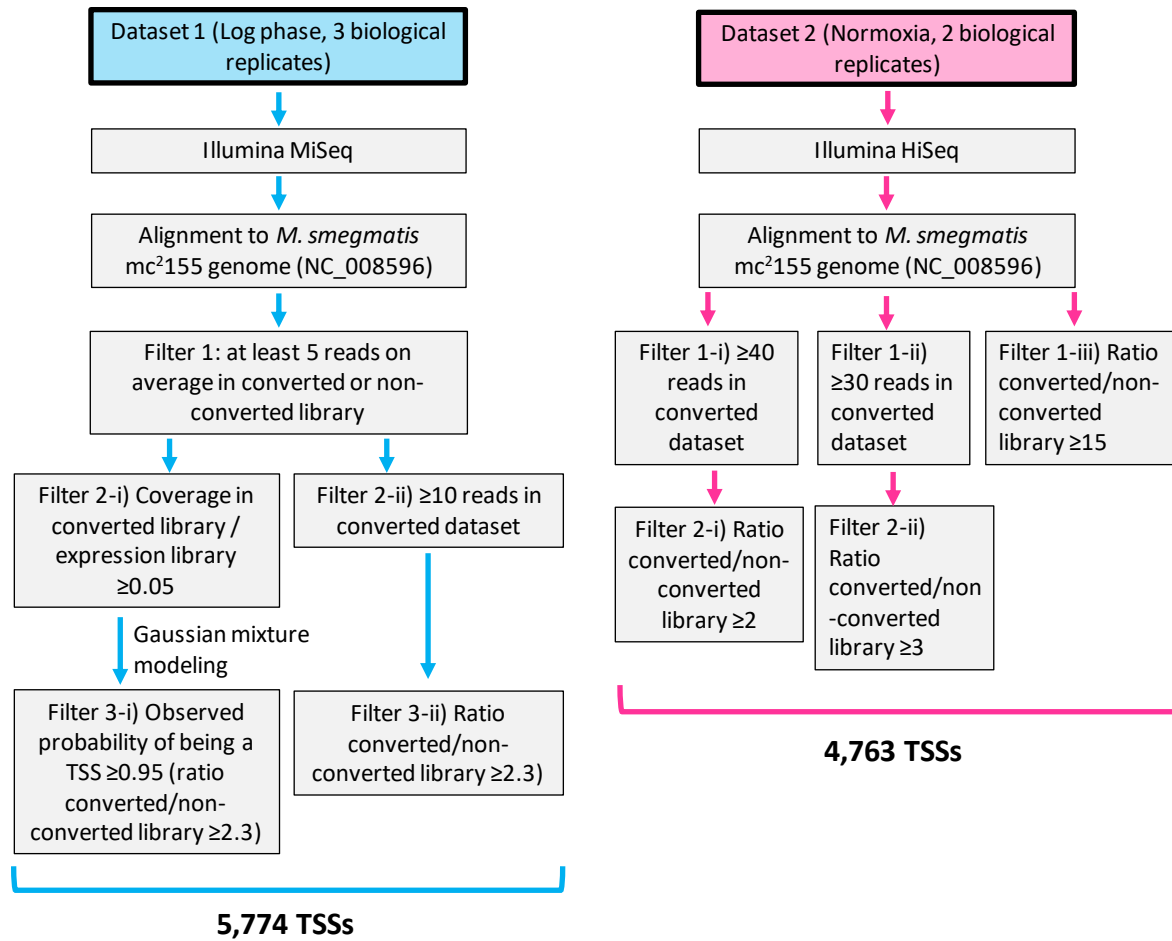

**Figure S3. Workflow for noise filtering and TSS prediction in the different datasets.**

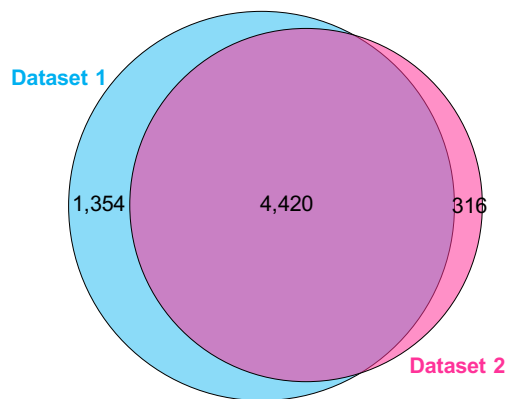

**Supplementary Figure 4. TSSs identified in the different datasets.** Dataset 1: exponential phase (5,774 TSSs), Dataset 2: a separate exponential phase dataset (aka normoxia) obtained as a control for a matched hypoxia dataset (4,736 TSSs).

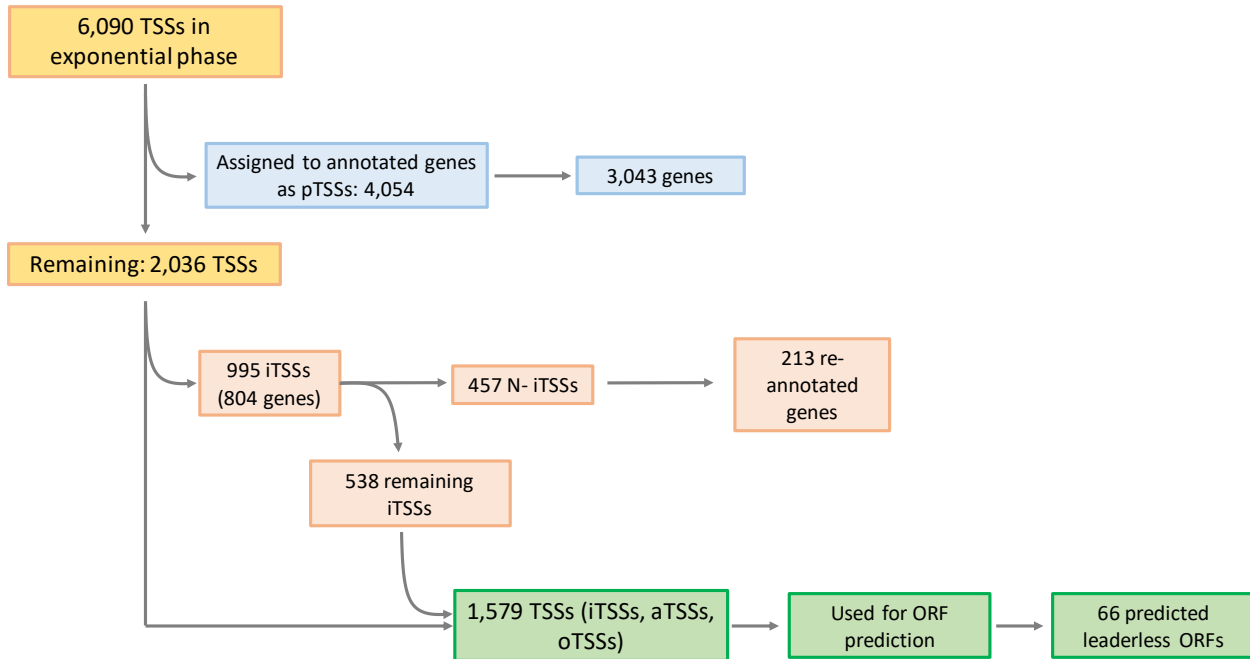

**Figure S5. Workflow used for TSS classification.** A complete scheme of the procedure used to classify TSSs is shown. TSSs located within 0-500 nt upstream of an annotated coding sequence were classified as pTSSs. TSSs located within annotated coding sequences were classified as iTSSs. iTSSs located within the first 25% of an annotated coding sequence were subclassified as N-iTSSs. When a gene lacked a pTSS, had an N-iTSS, and had an in-frame start codon downstream of the N-iTSS and within the first 30% of the coding sequence, the start codon of the gene was re-annotated. aTSSs (TSSs located on the antisense strand of a coding sequence, 5' UTR, or 3' UTR) and oTSSs (TSSs not belonging to any of the above-mentioned categories) were assigned as described in Figure 1D and Materials and Methods.

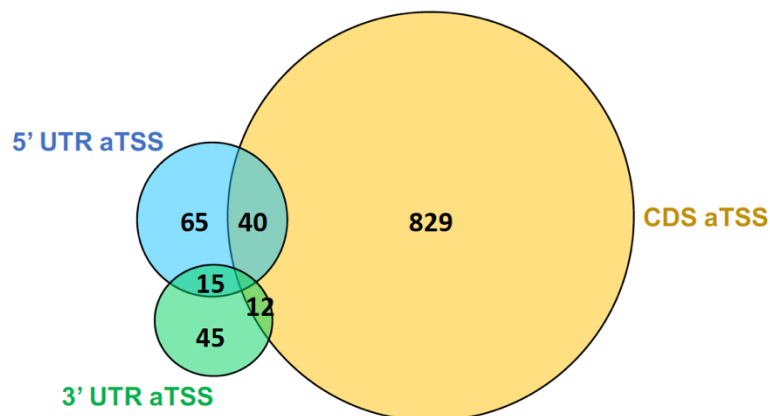

**Figure S6. Distribution of antisense TSSs.** The 1,006 aTSSs were classified according to their positions in 5' UTRs, 3' UTRs, and CDSs (coding sequences).

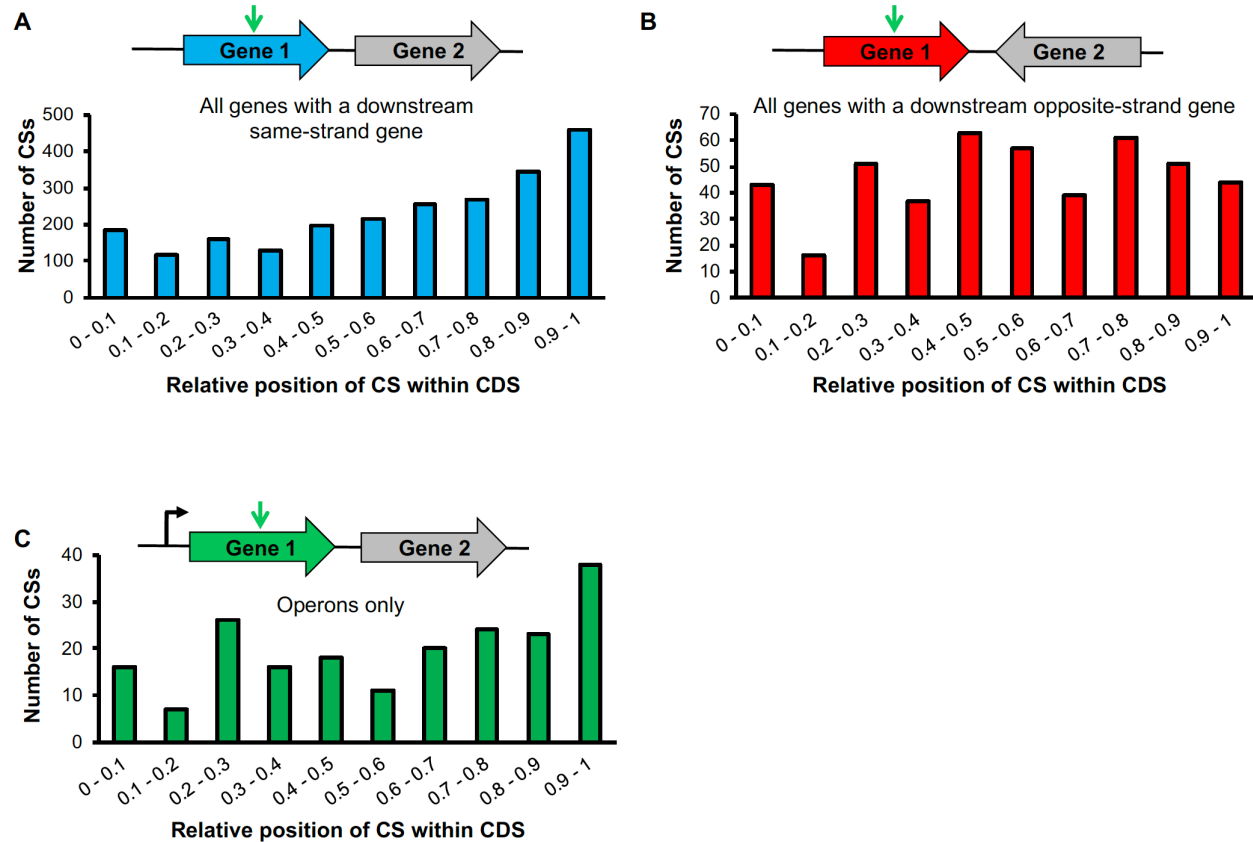

**Supplementary Figure 7. Cleavage sites distribution within genes according to coding sequence context.** The number of cleavage sites according to the relative position in the coding sequence is represented considering **A**) only coding sequences whose downstream gene is on the same strand, **B**) only coding sequences whose downstream gene is in the opposite strand (convergent), and **C**) only genes having a downstream gene transcribed as an operon. The CS distribution is significantly different between graphics A and B ( $p$ -value  $<0.0001$ , Kolmogorov Smirnov D test).

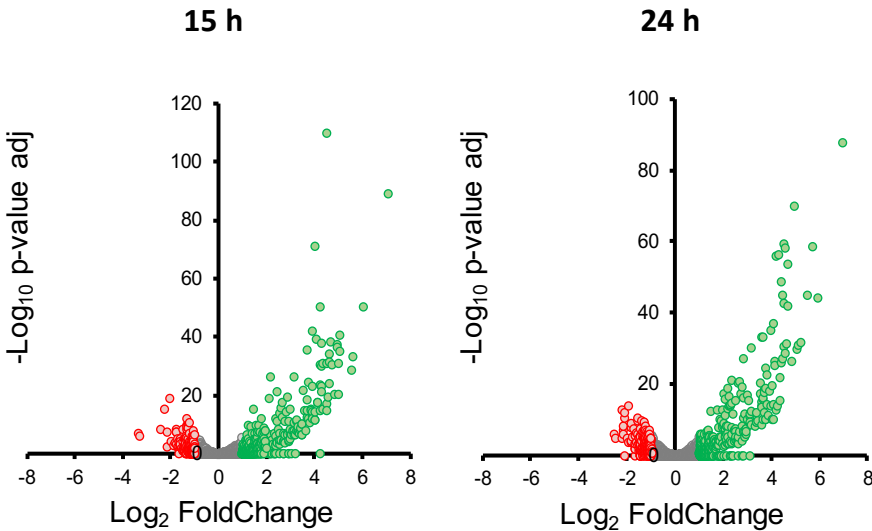

**Supplementary Figure 8. Gene expression levels in RNAseq expression libraries in hypoxia.** Changes in transcript levels were obtained by DEseq2 analysis, comparing each indicated condition to the control experiment. Genes upregulated and downregulated with a fold change  $\geq 2$  are highlighted in green and red, respectively.

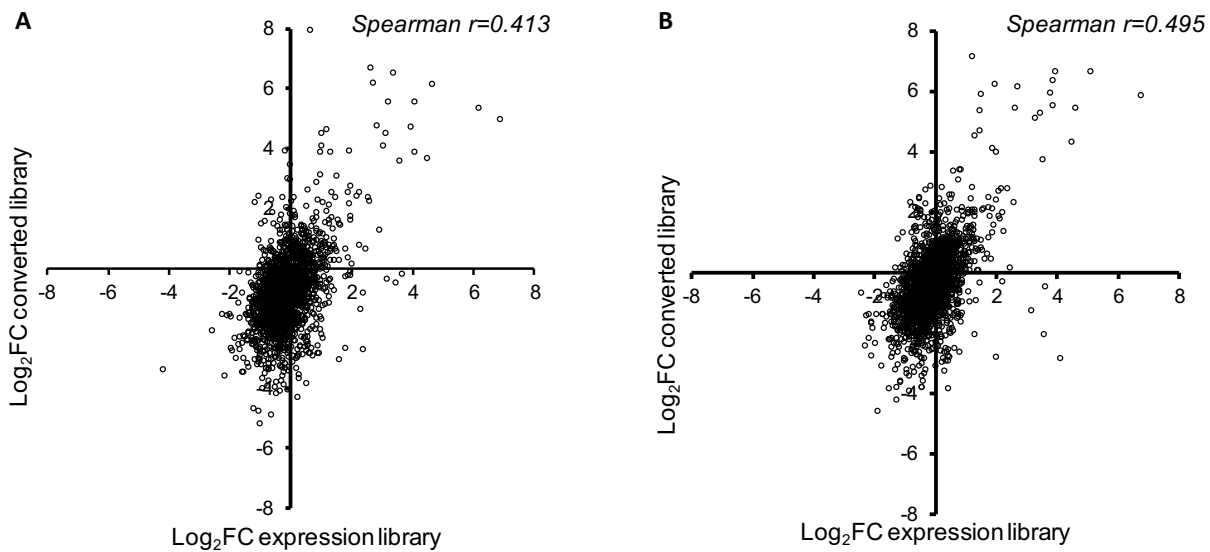

**Supplementary Figure 9. Correlation between expression data and 5' end-directed libraries data in hypoxia.** The X axis represents the Log<sub>2</sub> of the fold change in the expression libraries from hypoxia/normoxia datasets and the Y axis represents the Log<sub>2</sub> of the fold change in read depth in hypoxia/normoxia 5'-end-directed libraries. The analysis was done for hypoxia at 15 hours (A) and 24 hours (B). Genes having only one pTSS were used. The correlation is significant in both cases, with a  $p$ -value  $< 0.00001$ .



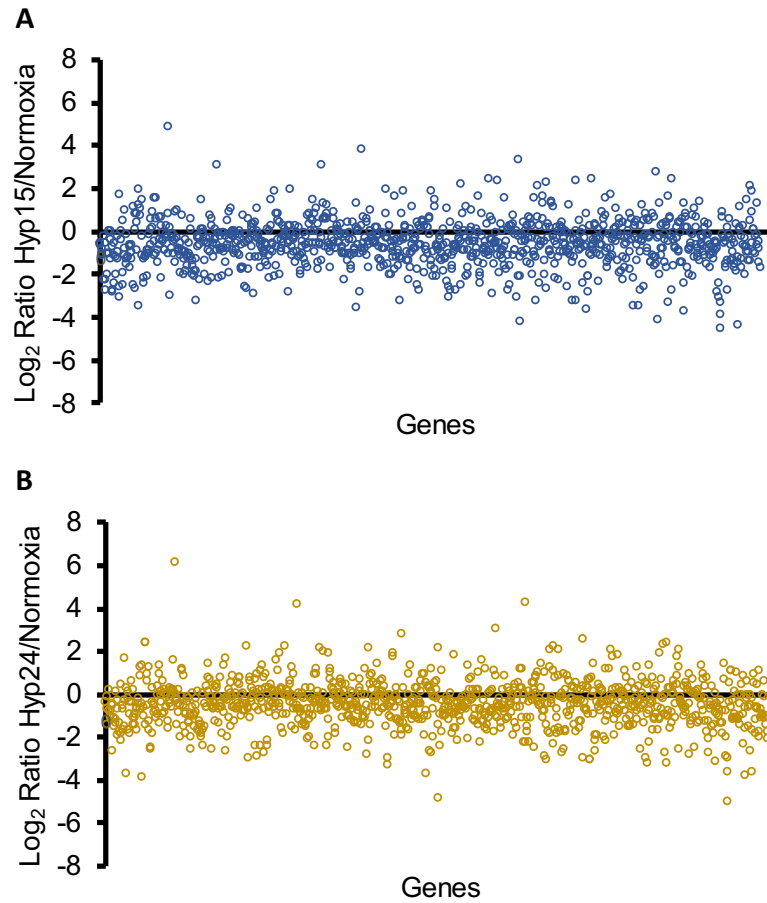

**Supplementary Figure 10. Changes in RNA cleavage within coding sequences in hypoxic conditions.** The number of cleavage events within each coding sequence was compared through the different conditions. The Log<sub>2</sub> of the ratio of the number of cleavages in hypoxia/control are shown. Each dot represents a specific gene. **A)** Hypoxia 15 hours, **B)** Hypoxia 24 hours.
